1 **GWAS of serum ALT and AST reveals an association of *SLC30A10***

2 **Thr95Ile with hypermanganesemia symptoms**

3

4 Lucas D. Ward<sup>1</sup>, Ho-Chou Tu<sup>1</sup>, Chelsea B. Quenneville<sup>1</sup>, Shira Tsour<sup>1</sup>, Alexander O. Flynn-  
5 Carroll<sup>1</sup>, Margaret M. Parker<sup>1</sup>, Aimee M. Deaton<sup>1</sup>, Patrick A. J. Haslett<sup>1</sup>, Luca A. Lotta<sup>2</sup>, Niek  
6 Verweij<sup>2</sup>, Manuel A. R. Ferreira<sup>2</sup>, Regeneron Genetics Center, Geisinger-Regeneron DiscovEHR  
7 Collaboration, Aris Baras<sup>2</sup>, Gregory Hinkle<sup>1</sup>, Paul Nioi<sup>1</sup>

8

9

10 1. Alnylam Pharmaceuticals, Cambridge, MA 02142

11 2. Regeneron Genetics Center, Tarrytown, NY 10591

12

13

14

15

16

17

18

19

20

21

## 22 **Abstract**

23 To investigate mechanisms of hepatocellular damage, we performed genome-wide association  
24 studies (GWAS) on alanine aminotransferase (ALT) and aspartate aminotransferase (AST)  
25 serum activities across 411,048 subjects from four ancestry groups in the UK Biobank, and  
26 found 100 loci associating with both enzymes. The rare missense variant *SLC30A10* Thr95Ile  
27 (rs188273166) associates with a larger elevation in ALT and AST than any other variant tested  
28 and this association also replicates in the DiscovEHR study. *SLC30A10* excretes manganese  
29 from the liver to the bile duct, and rare homozygous loss of function causes the syndrome  
30 hypermanganesemia with dystonia-1 (HMNDYT1) which involves cirrhosis. Consistent with  
31 hematological symptoms of hypermanganesemia, *SLC30A10* Thr95Ile carriers have increased  
32 hematocrit and risk of iron deficiency anemia. Carriers also have increased risk of extrahepatic  
33 bile duct cancer. These associations suggest that genetic variation in *SLC30A10* adversely  
34 affects more individuals than patients with diagnosed HMNDYT1.

## 35 **Introduction**

36 Liver disease remains an area of high unmet medical need, causing 3.5% of deaths worldwide,  
37 and the burden of liver disease is rising rapidly, driven mainly by increasing rates of  
38 nonalcoholic fatty liver disease (NAFLD)<sup>1,2</sup>. Better characterizing the genetic determinants of  
39 liver disease may lead to new therapies<sup>3</sup>. In addition, liver injury is a common side effect of  
40 drugs, and is a frequent reason that drugs fail to progress through the development pipeline;  
41 understanding the molecular mechanisms of liver injury can aid in preclinical drug evaluation to  
42 anticipate and avoid off-target effects<sup>4,5</sup>.

43 Circulating liver enzymes are sensitive biomarkers of liver injury; in particular, alanine  
44 aminotransferase (ALT) and aspartate aminotransferase (AST) are released into the circulation  
45 during damage to hepatocyte membranes<sup>6,7</sup>. The activities of circulating liver enzymes have  
46 been found to be highly heritable<sup>6,8-12</sup>, and variation even within the normal reference range is  
47 predictive of disease<sup>13</sup>. Accordingly, genome-wide association studies (GWAS) of activities of  
48 circulating liver enzymes across large population samples have proven powerful for  
49 understanding the molecular basis of liver disease<sup>6,14-24</sup>. Combined GWAS of ALT and AST  
50 have previously revealed genetic associations providing potential therapeutic targets for liver  
51 disease such as *PNPLA3*<sup>25</sup> and *HSD17B13*<sup>26</sup>. To further study the genetics of hepatocellular  
52 damage, we performed GWAS on serum activities of ALT and AST in 411,048 subjects, meta-  
53 analyzed across four ancestry groups in the UK Biobank (UKBB).

## 54 **Results**

### 55 **Discovery of ALT- and AST-associated loci by GWAS**

56 We performed a GWAS of ALT and AST in four sub-populations in the UKBB (demographic  
57 properties, **Supplementary Table 1**; sample sizes, number of variants tested, and  $\lambda_{GC}$  values,  
58 **Supplementary Table 2**; genome-wide significant associations, **Supplementary Table 3**;  
59 Manhattan and QQ plots for each enzyme and sub-population, **Supplementary Figures 1 and**  
60 **2**). After meta-analyzing across sub-populations to obtain a single set of genome-wide p-values  
61 for each enzyme (Manhattan plots, **Figure 1**), we found 244 and 277 independent loci  
62 associating at  $p < 5 \times 10^{-8}$  with ALT and AST, respectively, defined by lead single nucleotide  
63 polymorphisms (SNPs) or indels separated by at least 500 kilobases and pairwise linkage  
64 disequilibrium (LD)  $r^2$  less than 0.2. Enzyme activities were strongly associated with coding

65 variants in the genes encoding the enzymes, representing strong protein quantitative trait loci in  
66 *cis* (cis-pQTLs). For example rs147998249, a missense variant Val452Leu in *GPT* (glutamic-  
67 pyruvic transaminase) encoding ALT, strongly associates with ALT ( $p < 10^{-300}$ ) and rs11076256,  
68 a missense variant Gly188Ser in *GOT2* (glutamic-oxaloacetic transaminase 2) encoding the  
69 mitochondrial isoform of AST, strongly associates with AST ( $p = 6.3 \times 10^{-62}$ ). While these  
70 strong *cis*-pQTL effects validated our ability to detect direct genetic influences on ALT and  
71 AST, the aim of this study was to detect genetic determinants of liver health that have  
72 downstream effects on both ALT and AST due to hepatocellular damage; therefore we focused  
73 the remainder of our analyses only on the variants associated with serum activity of both  
74 enzymes (labeled with black text on **Figure 1**).

75

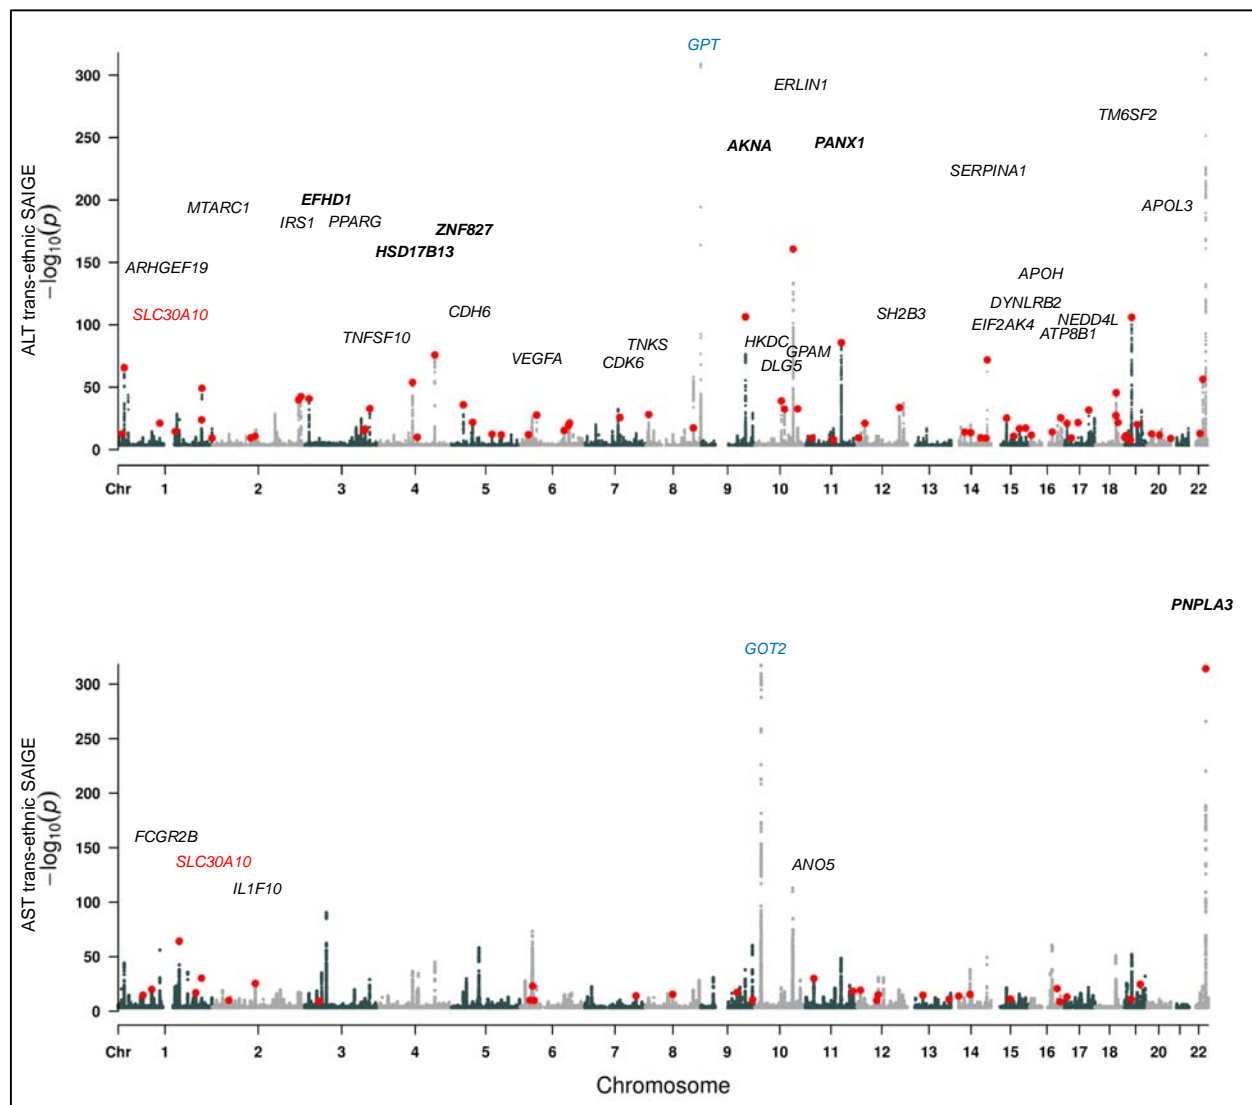

76

77 **Figure 1: Manhattan plots showing trans-ancestry GWAS results for ALT and AST. Red dots indicate lead**  
78 **variants for shared signals between the two GWAS; for clarity, the shared signals are marked only once, on the plot**  
79 **for the GWAS in which the more significant association is detected. Cis-pQTLs (at *GPT* and *GOT2*) are labeled in**  
80 **blue. Loci with shared signals are labeled (for clarity, only when  $p < 10^{-25}$  and only on the GWAS for which the**  
81 **association is most significant). Loci previously reported to associate with both ALT and AST are named in bold.**  
82 ***SLC30A10*, the main topic of this report, is labeled in red on both plots.**

83

84 Focusing only on loci with both ALT and AST GWAS signals (lead variants from either GWAS  
 85 were identical or shared proxies with  $r^2 \geq 0.8$ ), we found a total of 100 independent loci  
 86 associated with both enzymes (**Figure 2, Supplementary Table 4**). As expected, effect sizes on  
 87 ALT and AST at these loci were highly correlated ( $r = 0.98$ ), and at all 100 loci the direction of  
 88 effect on ALT and AST was concordant. Of these 100 loci, six were coincident or in strong LD  
 89 with a published ALT or AST variant in the EBI-NHGRI GWAS Catalog, and 15 were within  
 90 500kb of a published ALT or AST variant; 33 of the loci harbored a missense or predicted  
 91 protein-truncating variant; and of the remaining 67 entirely noncoding loci, 19 were coincident  
 92 or in strong LD with the strongest eQTL for a gene in liver, muscle, or kidney suggesting that  
 93 effects on gene expression may drive their associations with ALT and AST. A majority (70 of  
 94 the 100 loci) were shared with a distinct published association in the GWAS Catalog, suggesting  
 95 pleiotropy with other traits.  
 96

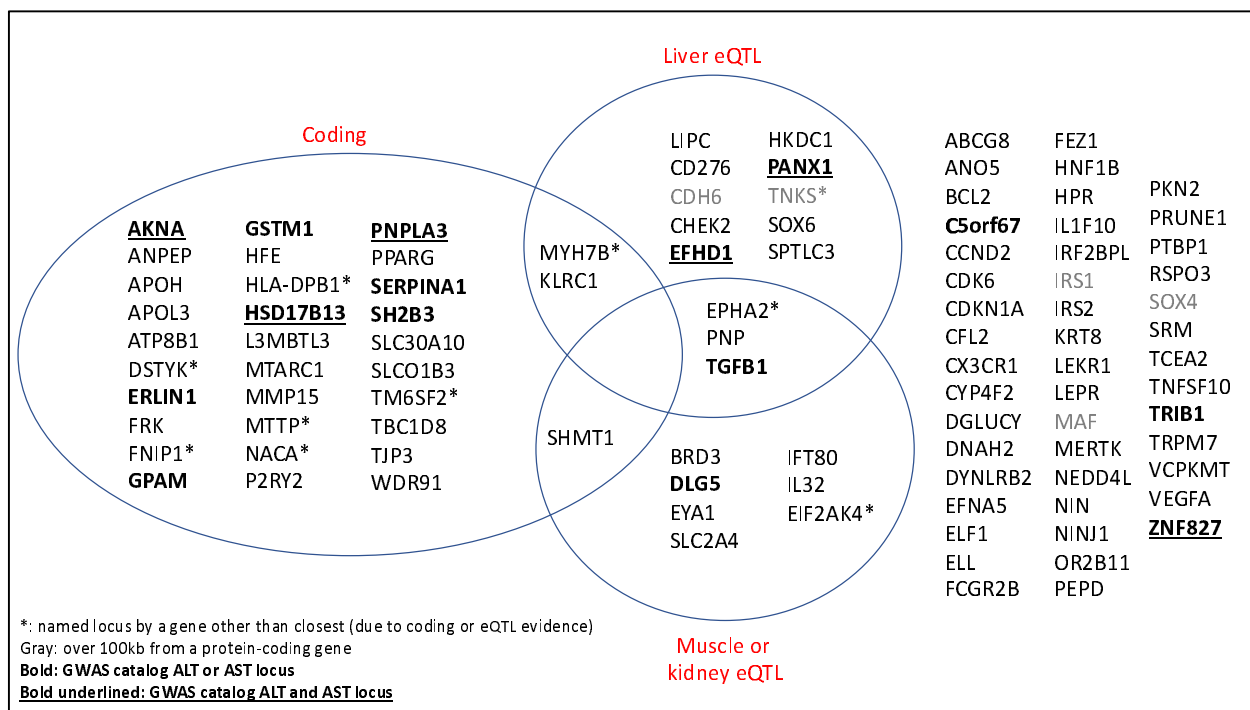

98 **Figure 2: Classification of the top ALT- and AST- associated loci based on annotations.** Unless otherwise noted  
99 with an asterisk, loci are named by the closest protein-coding gene. “Coding” indicates that one of the variants  
100 linked to the lead variant is predicted to have a moderate or high impact on a protein-coding gene. “Liver eQTL”  
101 and “Muscle or kidney eQTL” indicate that one of the variants linked to the lead variant is the strongest eQTL for a  
102 gene in those tissues by GTEX.

103

104 Comparing the effect sizes of all lead variants (**Supplementary Table 4**), the strongest estimated  
105 effect was a novel association: rs188273166, a rare (MAF in White British = 0.12%) missense  
106 variant (Thr95Ile) in *SLC30A10*, associated with a 4.2% increase in ALT (95% CI, 4.6% to  
107 7.1%;  $p = 1.6 \times 10^{-24}$ ) and 5.9% increase in AST (95% CI: 3.4% to 5.0%;  $p = 4.9 \times 10^{-31}$ ).  
108 Because Thr95Ile is coding and not strongly linked to any other variants, we considered it likely  
109 to be the causal variant driving the association at the *SLC30A10* locus. *SLC30A10* encodes a  
110 manganese efflux transporter (solute carrier family 30 member 10, also known as zinc  
111 transporter 10 or ZnT10)<sup>27,28</sup>. Loss-of-function mutations in *SLC30A10* have been reported to  
112 cause a rare recessive syndrome, hypermanganesemia with dystonia 1 (HMNDYT1),  
113 characterized by cirrhosis, dystonia, parkinsonism, polycythemia, and hypermanganesemia<sup>28-34</sup>.  
114 The next strongest effect on either enzyme was rs28929474, a missense variant (the Pi-Z allele)  
115 in *SERPINA1* (serpin family A member 1) which causes alpha-1 antitrypsin deficiency (AATD)  
116 in its homozygous state<sup>35</sup>, associated with a 2.5% increase in ALT (95% CI, 2.1% to 2.8%;  $p =$   
117  $1.4 \times 10^{-72}$ ) and 1.3% increase in AST (95% CI, 1.1% to 1.5%;  $p = 3.2 \times 10^{-50}$ ); AATD manifests  
118 with both lung and liver damage. The most statistically significant association with either  
119 enzyme was rs738409, a common missense variant (Ile148Met) in *PNPLA3* (patatin like  
120 phospholipase domain containing 3) known to strongly increase risk of liver disease<sup>25</sup>; it is

121 associated with a 2.2% increase in ALT (95% CI, 2.1% to 2.3%;  $p < 10^{-300}$ ) and a 1.3% increase  
122 in AST (95% CI, 1.3% to 1.4%;  $p < 10^{-300}$ ).

123

124 We observed significant heterogeneity in effects between sexes for both enzymes (Cochran's Q  
125 test  $p < 0.05/100$  for both enzymes) for three of the lead variants: rs9663238 at *HKDC1* (stronger  
126 effects in women), rs28929474 at *SERPINA1* (stronger effects in men), and rs1890426 at *FRK*  
127 (stronger effects in men) (**Supplementary Table 5**).

128

129 We tested the 100 lead variants from the ALT and AST GWAS analysis for association with a  
130 broad liver disease phenotype (ICD10 codes K70-77; 14,143 cases and 416,066 controls), meta-  
131 analyzing liver disease association results across all four sub-populations (**Supplementary**  
132 **Table 4**). Of the 100 lead variants, 28 variants associate with liver disease with  $p < 0.05$ . As  
133 expected, variants associated with an increase in ALT and AST tend to be associated with a  
134 proportional increase in liver disease risk (across all lead variants, Pearson correlation of betas  $r$   
135 = 0.82 for both enzymes; **Figure 3**). Liver disease is found more frequently in our sample of  
136 carriers of *SLC30A10* Thr95Ile (rs188273166), proportional with the observation of increased  
137 ALT and AST (OR = 1.47); however, owing to the small sample size of carriers and liver disease  
138 cases, we are underpowered to confidently determine whether this high point estimate is due to  
139 chance (although the 95% CI from the PLINK analysis used to estimate effects does not include  
140 OR = 0, the p value from the SAIGE analysis which more accurately controls for Type I error in  
141 highly unbalanced case-control studies is 0.07; see Methods).



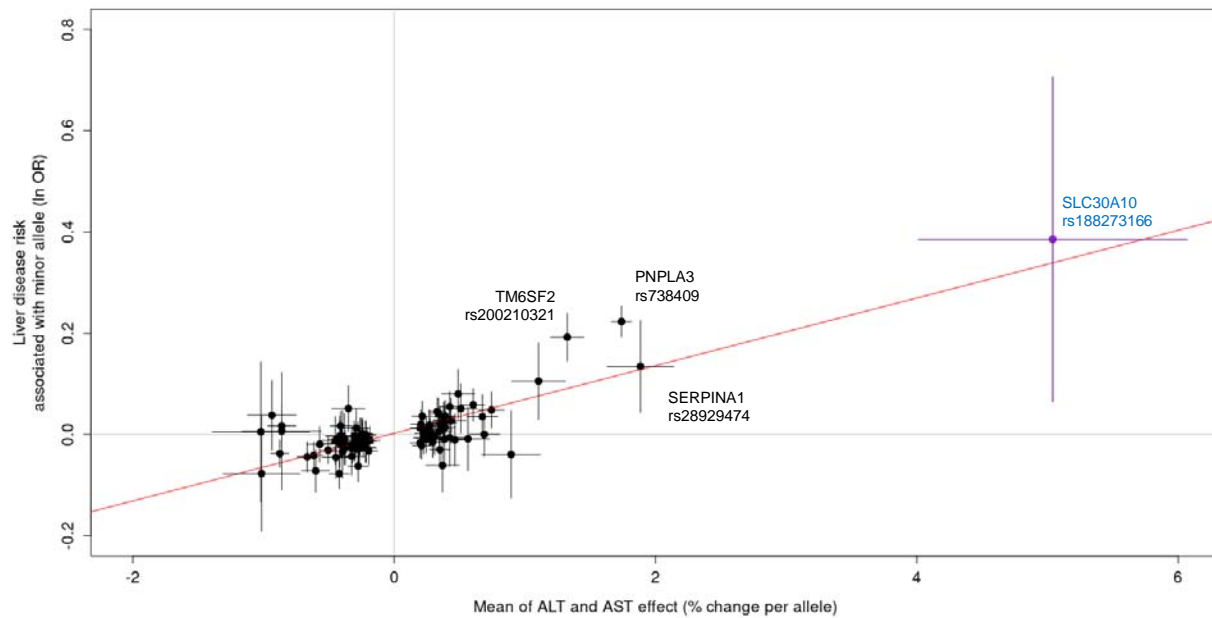

142

143 **Figure 3: Comparison of effect of lead variants on ALT and AST with effect on liver disease.** Effect sizes (beta  
144 from the regression of units of  $\log_{10}$  ALT and AST, equivalent to percent change; and beta from the liver disease  
145 regression, equivalent to natural log of the odds ratio) are from PLINK analysis; error bars are 95% confidence  
146 intervals on these effect sizes from PLINK.

147

148 Because *SLC30A10* Thr95Ile had the strongest effect on ALT and AST of all of our lead variants  
149 and has not been reported as being associated with any phenotypes in the literature, we centered  
150 the following analyses on better understanding its function.

151

### 152 **Validation of *SLC30A10* Thr95Ile genotype**

153 Because rare variants are especially prone to errors in array genotyping<sup>36</sup>, we sought to validate  
154 the array genotype calls for *SLC30A10* Thr95Ile in a subset of 301,473 individuals who had also  
155 been exome sequenced (**Supplementary Table 6**). The only individual homozygous for the  
156 minor (alternate) allele by array was confirmed by exome sequencing; no further homozygotes

157 were identified. Of 702 individuals called as heterozygous for Thr95Ile by array data who had  
158 exome data available, 699 (99.6%) were confirmed heterozygous by exome sequencing, while  
159 three were called homozygous reference by exome sequencing, suggesting an error either in the  
160 array typing or exome sequencing for these three individuals. Overall, these results demonstrate  
161 high concordance between array and exome sequencing, implying highly reliable genotyping.

162

### 163 **Magnitude of ALT and AST elevation in *SLC30A10* Thr95Ile carriers**

164 After establishing the association between *SLC30A10* Thr95Ile and ALT and AST, we sought to  
165 further explore the relationship between genotype and enzyme activity levels to understand  
166 clinical relevance. Carriers of Thr95Ile had a mean ALT of 27.37 U/L vs 23.54 U/L for  
167 noncarriers, and a mean AST of 28.85 U/L vs 26.22 U/L for noncarriers. Counting individuals  
168 with both ALT and AST elevated above 40 U/L, a commonly-used value for the upper limit of  
169 normal (ULN)<sup>7</sup>, 5.6% of carriers vs 3.6% of noncarriers had both enzymes elevated at the time of  
170 their UK Biobank sample collection, an increased relative risk of 58% (Fisher's  $p = 8.1 \times 10^{-4}$ )  
171 **(Supplementary Table 7).**

172

### 173 **Drinking behavior in *SLC30A10* Thr95Ile carriers**

174 The *SLC30A10* Thr95Ile has not been reported as associating with drinking behavior by any of  
175 the available studies in the GWAS Catalog. We used the drinking questionnaire taken by UK  
176 Biobank participants to assess drinking status at enrollment of *SLC30A10* Thr95Ile carriers  
177 (current, former, or never drinkers.) While the rate of current drinkers is higher among carriers vs  
178 non-carriers in the entire biobank (93.7% vs 91.7%, Fisher's  $p = 0.019$ ) **(Supplementary Table**  
179 **7)**, this association is highly confounded by genetic ancestry and country of birth

180 **(Supplementary Table 8)**. Limiting to the White British subpopulation and individuals born in  
181 England, the rate of current drinking is not detectably different among carriers (94.0% vs 93.4%,  
182 Fisher's  $p = 0.57$ ) while the rate of individuals with elevation of both ALT and AST over the  
183 ULN remains significant (5.5% vs. 3.5%, Fisher's  $p = 4.6 \times 10^{-3}$ ) **(Supplementary Table 7)**.

184

### 185 **Replication of ALT and AST associations**

186 The initial association of rs188273166 with ALT and AST was identified in the White British  
187 population. To replicate this association in independent cohorts, we first identified groups  
188 besides the White British subpopulation harboring the variant in the UKBB. The only two other  
189 populations with a substantial number of *SLC30A10* Thr95Ile carriers were individuals  
190 identifying as Other White and as White Irish **(Supplementary Table 8)**; we tested for  
191 association with ALT and AST in these subpopulations. We then tested the association in two  
192 independent cohorts from the DiscovEHR collaboration between the Regeneron Genetics Center  
193 and the Geisinger Health System<sup>37</sup>. Meta-analyzing the association results across these four  
194 groups (N = 132,992 and N = 131,646, respectively) confirmed the Thr95Ile association with  
195 increased ALT and AST ( $p = 6.5 \times 10^{-5}$  and  $p = 5.4 \times 10^{-6}$ , respectively) **(Supplementary Figure**  
196 **3, Supplementary Table 9)**. We also searched repositories of available complete summary  
197 statistics for ALT and AST GWAS and found two prior studies that reported associations<sup>21,38</sup>.  
198 Although these studies were underpowered to detect significant associations and were not  
199 reported in units that allowed their inclusion in our replication analysis, they were consistent  
200 with increases in both enzymes **(Supplementary Table 10)**.

201

## 202 **Independence of *SLC30A10* Thr95Ile from neighboring ALT and AST associations**

203 Because we applied distance and LD pruning to the results of the genome-wide scan to arrive at  
204 a set of lead variants, it was unclear how many independent association signals existed at the  
205 *SLC30A10* locus. Revisiting trans-ancestry association results in a window including 1 Mb  
206 flanking sequence upstream and downstream of *SLC30A10* revealed 76 variants with genome-  
207 wide significant associations with both ALT and AST (**Figure 4**). These 76 variants clustered  
208 into three loci: *SLC30A10* (only Thr95Ile, rs188273166); *MTARCI* (mitochondrial amidoxime  
209 reducing component 1, lead variant rs2642438 encoding missense Ala165Thr, previously  
210 reported to associate with liver disease and liver enzymes<sup>39</sup>, and six additional variants together  
211 spanning 68 kilobases); and *LYPLAL1-ZC3H11B* (intergenic region between lyophospholipase  
212 like 1 and zinc finger CCCH-type containing 11B, with array-genotyped variant rs6541227 and  
213 67 imputed variants spanning 46 kilobases), a locus previously reported to associate with non-  
214 alcoholic fatty liver disease (NAFLD)<sup>40</sup>.

215

216

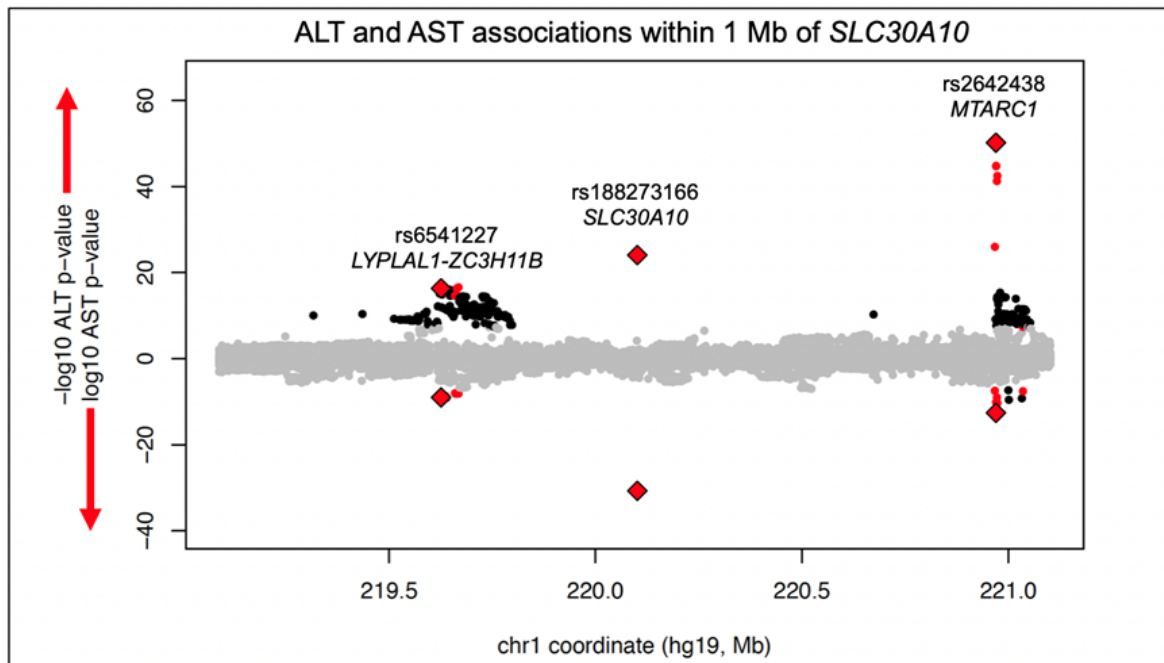

217

218 **Figure 4: Miami plot of trans-ancestry SAIGE GWAS results within 1 Mb of the gene body of *SLC30A10*.**

219 ALT associations are shown in the positive direction and AST associations in the negative direction. Variant  
220 associations reaching genome-wide significance for one enzyme are colored black; for both enzymes, colored red;  
221 directly-genotyped variants significant for both enzymes, red diamonds.

222

223 To test for independence between these three loci, we performed ALT and AST association tests  
224 for each of the three array-typed variants while including the genotype of either one or both of  
225 the others as covariates. Associations were similar in these conditional analyses, suggesting that  
226 each of these three associations are not confounded by linkage disequilibrium with the other  
227 regional association signals (**Supplementary Table 11.**) Therefore, the *SLC30A10* Thr195Ile  
228 association is statistically independent of the associations at neighboring loci. This statistical  
229 independence of the liver enzyme associations does not preclude a long-distance regulatory  
230 interaction between the three loci; for example, rs188273166, despite encoding an amino acid

231 change in *SLC30A10*, could conceivably influence transcription of *MTARC1*, and rs6541227,  
232 despite being nearest to *LYPLAL1* and *ZC3H11B*, may influence transcription of *SLC30A10*.  
233 However, these three variants are not detected as liver eQTLs for the genes at neighboring loci in  
234 published data<sup>41</sup>.

235

### 236 **Linkage of Thr95Ile to GWAS variants at *SLC30A10***

237 A GWAS of circulating toxic metals<sup>42</sup> discovered an association between a common intronic  
238 variant in *SLC30A10* (rs1776029; MAF in White British, 19.5%) and blood manganese levels,  
239 where the reference allele – which is the minor allele – is associated with increased circulating  
240 manganese. We calculated linkage disequilibrium statistics between rs1776029 and Thr95Ile and  
241 found that the minor allele of Thr95Ile (A) was in almost perfect linkage with the minor allele of  
242 rs1776029 (A) ( $r^2 = 0.005$ ,  $D' = 0.98$ ); Thr95Ile (rs188273166) is 154 times more frequent  
243 among carriers of at least one copy of the minor allele of common variant rs1776029 (95% CI =  
244 84 – 325; Fisher's  $p < 2.2 \times 10^{-16}$ ). These results suggest that the previously reported association  
245 of rs1776029 with circulating manganese may be partially or completely explained by linkage  
246 with Thr95Ile (**Supplementary Table 12**); however, genotypes of Thr95Ile in the manganese  
247 GWAS or manganese measurements in the UK Biobank would be needed in order to perform  
248 conditional analysis or directly measure association of Thr95Ile with serum manganese. We then  
249 systematically tested nearby variants reported in the GWAS Catalog for any phenotype for  
250 linkage to Thr95Ile, measured by high  $|D'|$ . Combining GWAS Catalog information and  $|D'|$   
251 calculations, we find nearly perfect linkage ( $|D'| > 0.90$ ) between rs188273166-A (rare missense  
252 Thr95Ile) with rs1776029-A (intronic), rs2275707-C (3'UTR), and rs884127-G (intronic), all  
253 within the gene body of *SLC30A10* (**Supplementary Table 13**). In addition to increased blood

254 Mn<sup>42</sup>, these three common alleles have been associated with decreased magnesium/calcium ratio  
255 in urine<sup>43</sup>, decreased mean corpuscular hemoglobin (MCH)<sup>44-46</sup>, increased red blood cell  
256 distribution width<sup>44-46</sup>, and increased heel bone mineral density (BMD)<sup>46-49</sup>. A recent study, not  
257 yet in the GWAS catalog, reported an association between another common intronic variant in  
258 *SLC30A10* (rs759359281; MAF in White British, 5.6%) and liver MRI-derived iron-corrected T1  
259 measures (cT1)<sup>50</sup>. However, the reported cT1-increasing allele of rs759359281, which is the  
260 minor allele, is in complete linkage ( $D' = 1$ ) with the major allele of Thr95Ile (rs188273166); in  
261 other words, the cT1-increasing allele and Thr95Ile liver disease risk allele occur on different  
262 haplotypes, suggesting that the mechanism of this reported cT1 association is independent of  
263 Thr95Ile.

264

### 265 **Phenome-wide associations of *SLC30A10* Thr95Ile**

266 To explore other phenotypes associated with *SLC30A10* Thr95Ile, we tested for association with  
267 135 quantitative traits and 4,398 ICD10 diagnosis codes within the White British population  
268 (**Supplementary Tables 14 and 15**). We were particularly interested in testing associations with  
269 phenotypes related to HMNDYT1, the known syndrome caused by homozygous loss of function  
270 of *SLC30A10*. Besides ALT and AST elevation, rs188273166 was associated with other  
271 indicators of hepatobiliary damage such as decreased HDL cholesterol and apolipoprotein A  
272 (ApoA)<sup>51</sup>, decreased albumin, and increased gamma glutamyltransferase (GGT). Other  
273 phenome-wide significant quantitative trait associations were increases in hemoglobin  
274 concentration and hematocrit (**Table 1**); increased hematocrit, or polycythemia, is a known  
275 symptom of HMNDYT1. Liver iron-corrected T1 by MRI (cT1), although only measured in  
276 seven carriers, was above the population median value in all seven (**Supplementary Figure 4**).

| Quantitative trait                 | Association with <i>SLC30A10</i> Thr95Ile |         |             |              |              |        |
|------------------------------------|-------------------------------------------|---------|-------------|--------------|--------------|--------|
|                                    | P                                         | signif. | Effect (SD) | 95% CI lower | 95% CI upper | N      |
| Aspartate aminotransferase         | 2.90E-32                                  | ***     | 0.38        | 0.31         | 0.44         | 387770 |
| Alanine aminotransferase           | 1.95E-25                                  | ***     | 0.32        | 0.25         | 0.38         | 389063 |
| HDL cholesterol                    | 1.18E-15                                  | ***     | -0.22       | -0.28        | -0.15        | 356214 |
| Apolipoprotein A                   | 7.25E-11                                  | ***     | -0.19       | -0.25        | -0.12        | 354247 |
| Albumin                            | 2.12E-08                                  | ***     | -0.17       | -0.24        | -0.10        | 356374 |
| Hemoglobin concentration           | 8.11E-06                                  | **      | 0.09        | 0.04         | 0.15         | 396065 |
| Hematocrit (percentage)            | 1.33E-05                                  | **      | 0.10        | 0.04         | 0.15         | 396065 |
| Gamma glutamyltransferase          | 9.86E-05                                  | **      | 0.12        | 0.05         | 0.18         | 388997 |
| Heel BMD                           | 2.05E-03                                  | *       | 0.13        | 0.05         | 0.22         | 237053 |
| Liver MRI: iron corrected T1 (cT1) | 3.31E-03                                  | *       | 1.22        | 0.48         | 1.96         | 2407   |

277 **Table 1: Association results of *SLC30A10* Thr95Ile with selected quantitative traits.** Association tests were  
278 performed in the White British population. P values are from SAIGE analysis; effect size estimates are from PLINK  
279 analysis. (\*\*\*) indicates genome-wide significance  $p < 5 \times 10^{-8}$ ; (\*\*) indicates phenome-wide significance of  $p < 3.7$   
280  $\times 10^{-4}$ ; (\*) indicates nominal significance of  $p < 0.05$ . All traits are rank-based inverse-normal transformed and effect  
281 size is in units of standard deviations of the transformed values.

282  
283 The only phenome-wide significant associations of diagnoses with *SLC30A10* Thr95Ile were  
284 C24.0, extrahepatic bile duct carcinoma, and C22.1, intrahepatic bile duct carcinoma. There are  
285 eight Thr95Ile carriers of each type of cancer, and six carriers with both types of cancer, for a  
286 total of ten carriers (1% of the 1,001 total carriers in the White British population) with bile duct  
287 carcinoma. Strikingly, over 5% of individuals with extrahepatic bile duct carcinoma (8 in 148)  
288 carry Thr95Ile. (**Table 2, Supplementary Table 15**).

289  
290 Among hematological manifestations of HMNDYT1, iron deficiency anemia was enriched  
291 among carriers (OR = 1.5, 95% CI, 1.1 to 1.9;  $p = 4.0 \times 10^{-3}$ ). Searching for neurological  
292 manifestations similar to HMNDYT1, we find no association with Parkinson's disease or  
293 dystonia but note that, as with liver diseases, we are powered to exclude only strong effects  
294 because of the small case number for these traits (**Supplementary Table 15**).



| Diagnosis                                           | Association with <i>SLC30A10</i> Thr95Ile |      |         |            |                    |                       |                             |      |        |      |
|-----------------------------------------------------|-------------------------------------------|------|---------|------------|--------------------|-----------------------|-----------------------------|------|--------|------|
|                                                     | P                                         | sig. | N cases | Prevalence | N cases (carriers) | Prevalence (carriers) | N cases expected (carriers) | OR   | 95% CI |      |
| C24.0: Malignant neoplasm of extrahepatic bile duct | 2.21E-09                                  | ***  | 148     | 0.04%      | 8                  | 0.80%                 | 0.4                         | 18.2 | 7.4    | 44.7 |
| C22.1: Intrahepatic bile duct carcinoma             | 6.22E-06                                  | **   | 424     | 0.10%      | 8                  | 0.80%                 | 1.0                         | 6.9  | 3.1    | 15.5 |
| K83.0: cholangitis                                  | 1.64E-05                                  | *    | 1297    | 0.32%      | 13                 | 1.30%                 | 3.2                         | 3.4  | 1.8    | 6.6  |
| K83.1: obstruction of bile duct                     | 1.12E-04                                  | *    | 1585    | 0.39%      | 13                 | 1.30%                 | 3.9                         | 2.7  | 1.4    | 5.3  |
| D50.9: Iron deficiency anemia, unspecified          | 9.86E-04                                  | *    | 14687   | 3.60%      | 55                 | 5.49%                 | 36.0                        | 1.7  | 1.3    | 2.3  |
| K81.0: Acute cholecystitis                          | 1.50E-03                                  | *    | 2270    | 0.56%      | 14                 | 1.40%                 | 5.6                         | 2.8  | 1.6    | 4.8  |
| D50: Iron deficiency anemia                         | 4.02E-03                                  | *    | 20073   | 4.92%      | 69                 | 6.89%                 | 49.2                        | 1.5  | 1.1    | 1.9  |

295 **Table 2: association results of *SLC30A10* Thr95Ile with selected ICD10 diagnosis codes.** P values are from  
 296 SAIGE analysis; effect size estimates are from PLINK analysis (exponentiated betas from logistic regression). (\*\*\*)  
 297 indicates genome-wide significance  $p < 5 \times 10^{-8}$ ; (\*\*) indicates phenome-wide significance of  $p < 1.1 \times 10^{-5}$ ; (\*)  
 298 indicates nominal significance of  $p < 0.05$ . Case counts are all limited to the White British subpopulation (N =  
 299 408,160), the only subpopulation with a substantial number of carriers (N = 1,001).

300

301 The top non-cancer hepatobiliary associations with *SLC30A10* Thr95Ile were with K83.0,  
 302 cholangitis; K83.1, obstruction of bile duct; and K81.0, acute cholecystitis. Because biliary  
 303 diseases are risk factors for cholangiocarcinoma and co-occur with them in our data, we tested  
 304 whether *SLC30A10* Thr95Ile was still associated with these biliary diseases, and the other  
 305 selected quantitative traits and diagnoses, after removing the 148 individuals with extrahepatic  
 306 bile duct cancer (**Supplementary Table 16, Supplementary Table 17**). All of the associations  
 307 remained significant except for intrahepatic bile duct carcinoma.

308

309 To test whether the association with extrahepatic bile duct cancer was driven by a nearby  
310 association, and to assess other risk variants and the potential for false positives given the  
311 extreme case-control imbalance, we performed a GWAS of the phenotype; remarkably,  
312 *SLC30A10* Thr95Ile was the strongest association genomewide, with minimal evidence for  
313 systematic inflation of p-values ( $\lambda_{GC} = 1.05$ ; **Figure 5, Supplementary Figure 5**).  
314

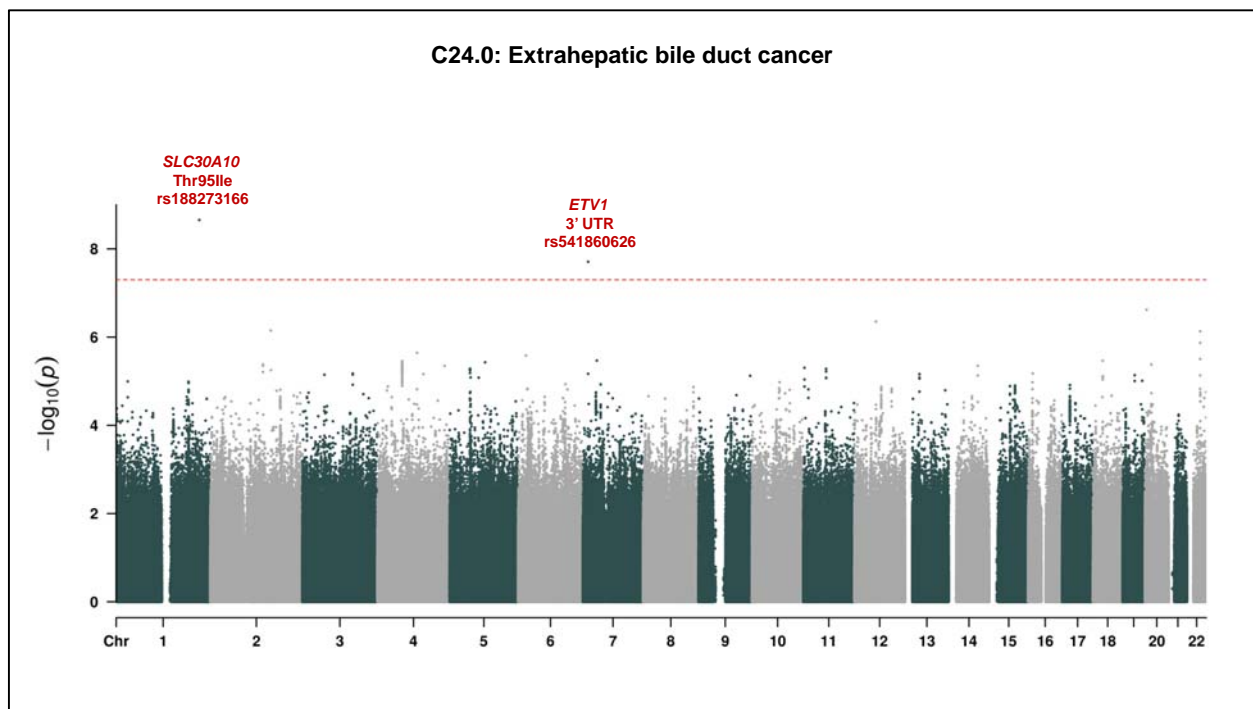

315  
316 **Figure 5.** GWAS of extrahepatic bile duct cancer. P values are from SAIGE in White British. Dashed line is  
317 genome-wide significance level of  $p = 5 \times 10^{-8}$ .

318

### 319 **Replication of hematocrit association**

320 A key result from the phenome-wide scan that was not related to hepatocellular damage was the  
321 association between *SLC30A10* Thr95Ile and increased hematocrit. Polycythemia is a symptom  
322 of HMNDYT1 mechanistically related to manganese overload. We meta-analyzed hematocrit

323 values from the Other White and White Irish populations, the DiscovEHR data, and a non-  
324 UKBB population (INTERVAL Study) from a published meta-analysis of hematocrit values<sup>45</sup>,  
325 and found that the association replicated (N = 179,689, p = 0.013; **Supplementary Table 18**).

326

### 327 ***SLC30A10* expression in liver cell subtypes**

328 Across organs, SLC30A10 is transcribed at the highest level in liver according to data from the  
329 GTEx Project<sup>52</sup>. The association of Thr95Ile with bile duct cancer led us to query expression of  
330 SLC30A10 in specific cell types within the liver using data from three single-cell RNA  
331 sequencing studies of liver<sup>53-55</sup>. These data show very low expression of SLC30A10 message in  
332 individual cells, but all studies detect expression in both hepatocytes and cholangiocytes  
333 (**Supplementary Table 19, Supplementary Figure 7**). Immunohistochemistry has established  
334 that SLC30A10 protein is present in hepatocytes and bile duct epithelial cells and localizes to the  
335 cholangiocyte plasma membrane, facing the lumen of the bile duct<sup>32</sup>.

336

### 337 **Bioinformatic characterization of *SLC30A10* Thr95Ile**

338 To understand potential functional mechanisms of the Thr95Ile variant, we examined  
339 bioinformatic annotations of SLC30A10 Thr95Ile from a variety of databases. The UNIPROT  
340 database shows that Thr95Ile occurs in the third of six transmembrane domains and shares a  
341 domain with a variant known to cause HMNDYT1 (**Supplementary Figure 8**). Several *in silico*  
342 algorithms predict that Thr95Ile is a damaging mutation. The CADD (Combined Annotation  
343 Dependent Depletion) algorithm, which combines a broad range of functional annotations, gives  
344 the variant a score of 23.9, placing it in the top 1% of deleteriousness scores for genome wide  
345 potential variants. The algorithm SIFT, which uses sequence homology and physical properties

346 of amino acids, predicts Thr95Ile as deleterious. The algorithm PolyPhen-2 gives Thr95Ile a  
347 HumDiv score of 0.996 (probably damaging), based on patterns of sequence divergence from  
348 close mammalian homologs, and a HumVar score of 0.900 (possibly damaging), based on  
349 similarity to known Mendelian mutations. Cross-species protein sequence alignment in  
350 PolyPhen-2 shows only threonine or serine at position 95 across animals. These properties  
351 suggest that Thr95Ile substitution ought to have an effect the function of the SLC30A10 protein.

352

### 353 **Characterization of *SLC30A10* variants *in vitro***

354 To test the protein localization of SLC30A10 harboring Thr95Ile as well as other variants, we  
355 created constructs with Thr95Ile (rs188273166) and the HMNDYT1-causing variants Leu89Pro  
356 (rs281860284) and del105-107 (rs281860285) and transfected these constructs into HeLa cells.  
357 Immunofluorescence staining revealed membrane localization for wild-type (WT) SLC30A10  
358 which was abolished by the two HMNDYT1 variants, consistent with previous reports which  
359 showed that the HMNDYT1 variant proteins are mislocalized in the endoplasmic reticulum  
360 (ER)<sup>56</sup>. In contrast, Thr95Ile showed membrane localization similar to WT, suggesting that  
361 Thr95Ile does not cause a deficit in protein trafficking to the membrane (**Figure 6**).

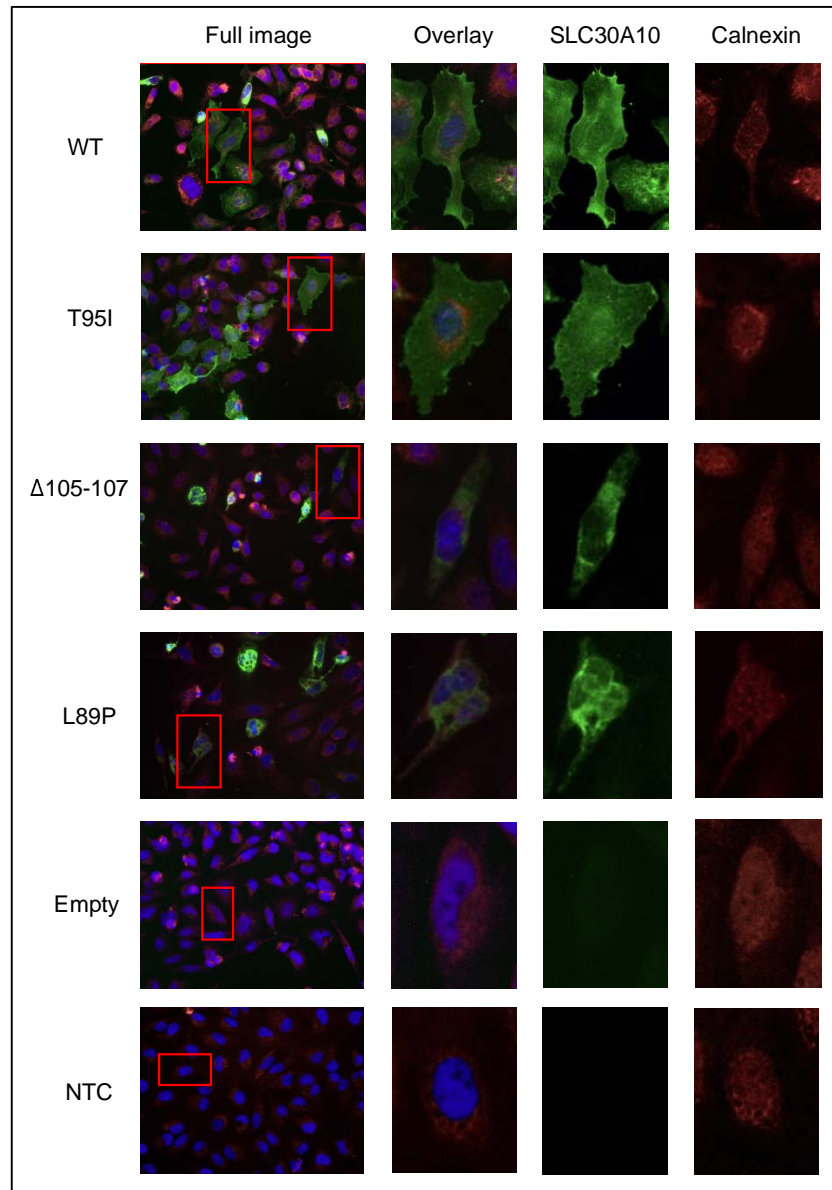

362

363 **Figure 6: Immunofluorescence imaging of SLC30A10 protein constructs expressed in cultured HeLa cells.**

364 WT = wild type; T95I = Thr95Ile;  $\Delta$ 105-107 and L89P, HMNDYT1-causing variants reported previously [<sup>56</sup>];

365 empty = transfected with empty vector; NTC = non transfected control. Calnexin staining (in red) indicates the

366 endoplasmic reticulum (ER).

## 367 **Discussion**

### 368 **Expanded genetic landscape of risk for hepatocellular damage**

369 Our trans-ancestry GWAS of ALT and AST reveals a broad genetic landscape of loci that  
370 modulate risk of hepatocellular damage or other diseases that cause increases in circulating ALT  
371 and AST, bringing the number of loci known to associate with serum activities of both enzymes  
372 from 10 (currently in the GWAS Catalog) to 100. Two loci had been previously reported in  
373 majority-European ancestry GWAS of ALT and AST as associating with both enzymes:  
374 *PNPLA3*<sup>14,15,18-20,57-59</sup> and *HSD17B13*<sup>14,18,26</sup>; we detect ALT and AST signals at both of these  
375 loci. Broadening beyond majority-European ancestry GWAS, an additional eight loci have been  
376 previously identified: *PANX1*<sup>18</sup>, *ALDH2*<sup>17,19</sup>, *CYP2A6*<sup>18,57</sup>, *ABCB11*<sup>18</sup>, *ZNF827*<sup>18</sup>, *EFHD1*<sup>18</sup>,  
377 *AGER-NOTCH4*<sup>18,60</sup>, and *AKNA*<sup>18</sup>; we replicate four of these in our trans-ancestry GWAS  
378 (*PANX1*, *ZNF827*, *EFHD1*, and *AKNA*.) We are limited by the lack of diversity in the UK  
379 Biobank and expect that studies in more diverse populations will result in the discovery of new  
380 loci and alleles.

381  
382 Among the novel loci are many that had been previously identified as risk loci for liver disease,  
383 but had never been explicitly associated through GWAS of both ALT and AST, such as  
384 *SERPINA1* (associated with alpha-1 antitrypsin deficiency<sup>35</sup>), *HFE* (homeostatic iron regulator,  
385 associated with hemochromatosis<sup>61</sup>), and *TM6SF2* (transmembrane 6 superfamily member 2,  
386 associated with NAFLD<sup>62-64</sup>). The *MTARCI* lead variant was discovered in a GWAS of cirrhosis,  
387 and then found to associate with lower ALT and AST<sup>39</sup>. Others are known to associate with risk  
388 of gallstones (*ABCG8*, *ANPEP*, and *HNF1B*)<sup>65,66</sup> or increased GGT (*EPHA2*, *CDH6*, *DLG5*,  
389 *CD276*, *DYNLRB2*, and *NEDD4L*)<sup>14,18</sup>. Consistent with the fact that ALT and AST elevation can

390 be caused by kidney or muscle damage, we detect an association with *ANO5* (anoctamin 5),  
391 which has been implicated in several autosomal recessive muscular dystrophy syndromes<sup>67,68</sup>,  
392 and several loci associated with expression of genes in muscle or kidney but not liver (*SHMT1*,  
393 *BRD3*, *DLG5*, *EYA1*, *IFT80*, *IL32*, *EIF2AK4*, and *SLC2A4*). We expect only a subset of the loci  
394 from this screen to be directly causally implicated in hepatocellular damage; many may  
395 predispose to a condition where liver damage is secondary or affect kidney or muscle, an  
396 important limitation of this approach.

397

398 The significant sex heterogeneity we observe at the ALT- and AST- associated loci *HKDC1*,  
399 *SERPINA1*, and *FRK* warrants further investigation and is consistent with a prior study that  
400 found significant genotype-by-sex interactions in the genetic architecture of circulating liver  
401 enzymes<sup>6</sup>. *HKDC1* has been associated with glucose metabolism and notably, this effect is  
402 specific to pregnancy<sup>69,70</sup>.

403

404 *SLC30A10* had not previously been identified in prior GWAS of circulating liver enzymes.  
405 Because *SLC30A10* Th95Ile is so rare, it is not surprising that these scans were underpowered to  
406 detect its large effect, due either to insufficient study size, lack of inclusion on the genotyping  
407 arrays used, or lack of power to impute its genotype. For example, in the UK Household  
408 Longitudinal Study (N = 5,458 and N = 5,321, respectively) effects were reported that were  
409 consistent with a strong effect size but were not statistically significant (**Supplementary Table**  
410 **10**).

411

## 412 **Properties of *SLC30A10* Thr95Ile**

413 The variant with the strongest predicted effect on ALT and AST, *SLC30A10* Thr95Ile  
414 (rs188273166), is a rare variant carried by 1,117 of the 487,327 array-genotyped participants in  
415 the UK Biobank. While Thr95Ile is found in some individuals of non-European ancestry, it is at  
416 much higher frequency in European-ancestry populations, with carrier frequency in our sample  
417 by UK country of birth ranging from a minimum of 1 in 479 people born in Wales to a maximum  
418 of 1 in 276 people born in Scotland (**Supplementary Table 5**). The increased frequency we see  
419 in European-ancestry populations is not merely due to those populations' overrepresentation in  
420 the UK Biobank, but is also consistent with global allele frequency data catalogued in dbSNP<sup>71</sup>.

421  
422 The Thr95Ile variant occurs in the third of six transmembrane domains of the *SLC30A10*  
423 protein<sup>72</sup>, the same domain affected by a previously reported loss-of-function variant causing  
424 HMNDY1 (hypermanganesemia with dystonia 1), Leu89Pro (rs281860284)<sup>56</sup> (**Figure 6**). In  
425 vitro, Leu89Pro abolishes trafficking of *SLC30A10* to the membrane<sup>56</sup>, and another study  
426 pointed to a functional role of polar or charged residues in the transmembrane domains of  
427 *SLC30A10* for manganese transport function<sup>73</sup>. Bioinformatic analysis suggests that Thr95Ile  
428 should impact protein function.

429 Our site-directed mutagenesis experiment of *SLC30A10* shows that Thr95Ile, unlike reported  
430 HMNDYT1-causing variants, results in a protein that is properly trafficked to the cell membrane.  
431 Further biochemical studies will be required to investigate whether the Thr95Ile variant of  
432 *SLC30A10* has reduced manganese efflux activity, or otherwise affects *SLC30A10* stability,  
433 translation, or transcription.



434

### 435 **Comparison of *SLC30A10* Thr95Ile phenotypes to HMNDYT1 phenotypes**

436 *SLC30A10* (also known as *ZNT10*, and initially identified through sequence homology to zinc  
437 transporters<sup>27</sup>) encodes a cation diffusion facilitator expressed in hepatocytes, the bile duct  
438 epithelium, enterocytes, and neurons<sup>32</sup> that is essential for excretion of manganese from the liver  
439 into the bile and intestine<sup>28,32</sup>. Homozygous loss-of-function of *SLC30A10* was recently  
440 identified as the cause of the rare disease HMNDYT1, which in addition to hypermanganesemia  
441 and dystonia is characterized by liver cirrhosis, polycythemia, and Mn deposition in the brain<sup>29-</sup>  
442 <sup>34,56</sup>. Other hallmarks include iron depletion and hyperbilirubinemia. Mendelian disorders of  
443 *SLC30A10* and the other hepatic Mn transporter genes *SLC39A8* (solute carrier family 39  
444 member 8, causing congenital disorder of glycosylation type II<sub>n</sub>)<sup>74</sup> and *SLC39A14* (solute carrier  
445 family 39 member 14, implicated in hypermanganesemia with dystonia 2)<sup>75</sup>, along with  
446 experiments in transgenic mice<sup>76,77</sup>, have confirmed the critical role of each of these genes in  
447 maintaining whole-body manganese homeostasis<sup>78</sup>. Notably, while all three of the genes have  
448 Mendelian syndromes with neurological manifestations, only *SLC30A10* deficiency  
449 (HMNDYT1) is known to be associated with liver disease<sup>78</sup>.

450

451 We detect two key aspects of HMNDYT1 – increased circulating liver enzymes and increased  
452 hematocrit – exceeding phenome-wide significance in heterozygous carriers of *SLC30A10*  
453 Thr95Ile. Among other hepatic phenotypes that have been reported in HMNDYT1 cases, we  
454 also detect an association with anemia, but no evidence of hyperbilirubinemia. The neurological  
455 aspect of HMNDYT1, parkinsonism and dystonia, is not detectably enriched among Thr95Ile  
456 carriers; however, we have limited power and cannot exclude an enrichment. It is therefore

457 intriguing to consider that carrier status of Thr95Ile may represent a very mild manifestation of  
458 HMNDYT1.

459

460 The quantitative trait with the largest effect associated with *SLC30A10* Thr95Ile is liver MRI  
461 cT1 (+1.2 SD; 95% CI, +0.5 to +2.0;  $p = 0.0032$ ). Liver MRI cT1 has been recently explored as a  
462 non-invasive diagnostic of steatohepatitis and fibrosis<sup>79,80</sup>. However, MRI T1 signal has also  
463 been used to detect manganese deposition in the brain, and it is unclear the extent to which  
464 hepatic manganese overload could confound the association of liver cT1 with liver damage<sup>81</sup>.

465

#### 466 **Comparison of Thr95Ile phenotypes to *SLC30A10* common variant phenotypes**

467 Apart from rare variants in *SLC30A10* causing HMNDYT1, Thr95Ile can also be compared to  
468 common variants in *SLC30A10* that have been associated with phenotypes by GWAS (**Figure 7**).  
469 We find that the minor allele of Thr95Ile is in almost complete linkage with a common intronic  
470 variant associated with increased blood manganese. Other GWAS variants in almost perfect  
471 linkage with Thr95Ile associate with decreased MCH, increased RBC distribution width,  
472 decreased magnesium/calcium ratio, and increased heel bone mineral density (BMD). Decreased  
473 MCH could reflect the anemia experienced by HMNDYT1 patients, caused by the closely linked  
474 homeostatic regulation of manganese and iron<sup>28</sup>. Increased BMD may reflect the protective role  
475 of manganese in bone maintenance<sup>82,83</sup>. Looking for the subset of these phenotypes available in  
476 our scan of Thr95Ile, we do find a nominally significant increase in BMD but no detectable  
477 increase in MCH or erythrocyte distribution width. By contrast, we find that a common intronic  
478 variant in *SLC30A10* recently reported to associate with liver MRI cT1<sup>50</sup> is in complete linkage  
479 with the major allele of Thr95Ile, suggesting an independent genetic mechanism but also

480 providing independent evidence of the role of *SLC30A10* variants in liver health and/or hepatic  
481 manganese content.  
482

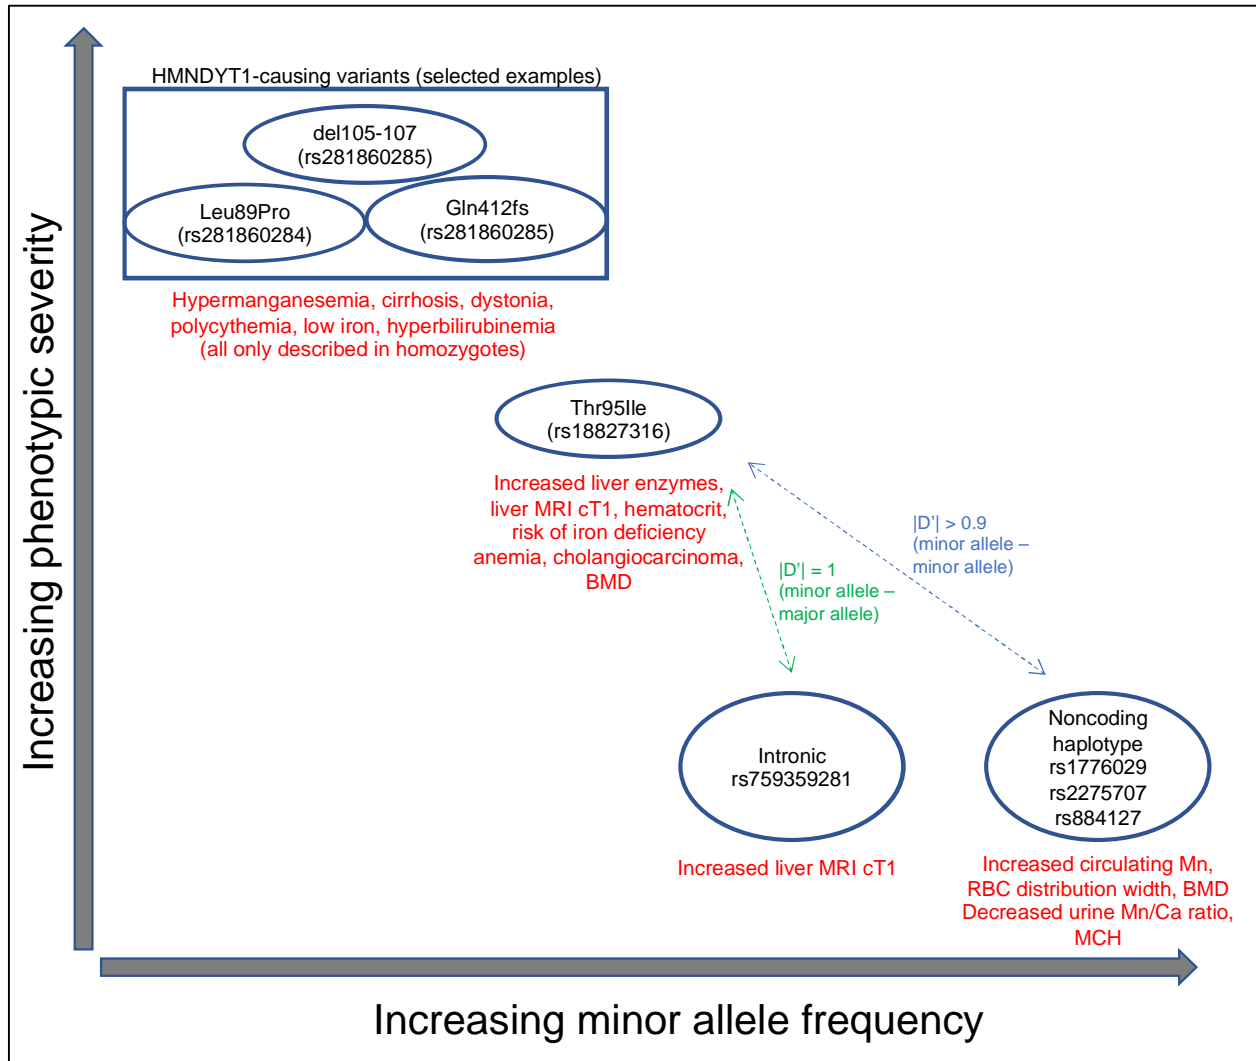

484 **Figure 7: Relationship of Mendelian and common-variant GWAS phenotypes at the *SLC30A10* locus.**  
485 Phenotypes are summarized for HMNDYT1-causing variants, *SLC30A10* Thr95Ile, and GWAS variants.

486  
487 The linked GWAS variants may be interpreted through two mechanistic hypotheses: first, the  
488 associations may all be causally driven by Thr95Ile carriers in the studies, which the GWAS  
489 variants tag; alternatively, the associations may be driven by effects of the common variants

490 themselves, which are noncoding but may influence *SLC30A10* (or another gene in cis) by  
491 modulating expression or post-transcriptional regulation; or some combination of both. To  
492 distinguish between these, measurements of Mn would need to be available to perform  
493 conditional analyses. If the GWAS variants have an effect independent of Thr95Ile, *SLC30A10*  
494 still seems likely (although not certain) to be the causal gene at the locus, due to the similarity in  
495 phenotypes to HMNDYT1 and Thr95Ile. A putative regulatory mechanism could be through  
496 transcriptional or post-transcriptional regulatory elements, as the haplotype includes a variant  
497 (rs2275707) overlapping both the 3'-UTR of *SLC30A10* and H3K4me1 histone modifications  
498 characteristic of enhancers active only in brain and liver<sup>84</sup>.

499

## 500 **Clinical relevance: manganese homeostasis in health and disease**

501 Manganese (Mn) is a trace element required in the diet for normal development and function,  
502 serving as a cofactor and regulator for many enzymes. However, it can be toxic in high doses;  
503 because Mn(II) and Mn(III) can mimic other cations such as iron, it can interfere with systemic  
504 iron homeostasis and disrupt in other biochemical processes<sup>85,86</sup>; at the cellular level, it is  
505 cytotoxic and poisons the mitochondria by interfering with the electron transport chain enzymes  
506 that rely on Fe-S clusters<sup>87</sup>. The hallmark of occupational exposure through inhalation is  
507 neurotoxicity manifesting as parkinsonism and dystonia (manganism, or Mn intoxication)<sup>85,86</sup>.  
508 Neurotoxicity is an aspect of the Mendelian syndromes caused by loss of function of all three of  
509 the hepatic manganese transporters; interestingly, GWAS has also identified a common missense  
510 variant in *SLC39A8* as a risk factor for schizophrenia and many other diseases<sup>88,89</sup>; altered  
511 function of glycosyltransferases due to manganese overload in the neurons is a proposed  
512 mechanism for neurological manifestations of this variant<sup>90</sup>. Because manganese is excreted

513 through the liver into the bile, increased circulating manganese secondary to liver damage may  
514 be a contributing factor to the neurological manifestations of chronic acquired hepatocerebral  
515 degeneration (CAHD)<sup>91-93</sup>. However, liver toxicity is not a hallmark of environmental or  
516 occupational exposure. Importantly, of the Mendelian syndromes of genes encoding manganese  
517 transporters, only *SLC30A10* (causing HMNDYT1) involves hepatic symptoms<sup>78,94</sup>.  
518 Hepatotoxicity in HMNDYT1 is thought to be due to cytotoxic manganese overload within  
519 hepatocytes; polycythemia is thought to be caused by upregulation of erythropoietin by  
520 manganese; and iron anemia through systemic dysregulation of iron homeostasis by excess  
521 manganese<sup>94,95</sup>. Our results suggest that polymorphism in *SLC30A10* is a risk factor for  
522 manganese-induced hepatocellular damage, polycythemia, and iron anemia in a much broader  
523 population beyond the rare recessive syndrome HMNDYT1.

524

525 The association of *SLC30A10* Thr95Ile with extrahepatic bile duct cancer was unexpected, as  
526 this disease has not been described in conjunction with HMNDYT1. Bile duct cancer  
527 (cholangiocarcinoma) is a rare disease (age-adjusted incidence of 1 – 3 per 100,000 per year);  
528 cirrhosis, viral hepatitis, primary sclerosing cholangitis, and parasitic fluke infection have been  
529 identified as risk factors<sup>96,97</sup>. It is unclear whether low levels of manganese in the bile, or high  
530 levels of manganese in the hepatocytes and bile duct epithelial cholangiocytes, could be directly  
531 carcinogenic; manganese-dependent superoxide dismutase (MnSOD, or SOD2) is a tumor  
532 suppressor<sup>98</sup>. A simpler possibility is that cytotoxic manganese overload in hepatocytes and  
533 cholangiocytes causes localized inflammation that predisposes to cancer through similar  
534 mechanisms as other hepatobiliary risk factors. We do detect an association with cholangitis, but  
535 the effect of this association is weaker than the association with cholangiocarcinoma. To our

536 knowledge, *SLC30A10* Thr95Ile would be the strongest genetic cholangiocarcinoma risk factor  
537 identified to date, being carried by 5% of the extrahepatic bile duct cancer cases in the White  
538 British subset of the biobank. Because both *SLC30A10* Thr95Ile and extrahepatic bile duct  
539 cancer are exceedingly rare, validation of this association in either another very large biobank or  
540 in a cohort of cholangiocarcinoma patients will be necessary.

541

#### 542 **Clinical relevance: genome interpretation**

543 Currently, *SLC30A10* Thr95Ile (rs188273166) is listed as a variant of uncertain significance in  
544 the ClinVar database<sup>99</sup>. While the appropriate clinical management of carriers of *SLC30A10*  
545 Thr95Ile is unclear and would require further studies to determine whether monitoring of  
546 hepatobiliary function is warranted, evidence from HMNDYT1 patients has demonstrated that  
547 chelation therapy combined with iron supplementation is effective at reversing the symptoms of  
548 *SLC30A10* insufficiency<sup>100</sup>. Further studies will be needed to define whether other damaging  
549 missense variants or protein-truncating variants in *SLC30A10*, including the variants known to  
550 cause HMNDYT1, also predispose to liver disease in their heterozygous state. Because we only  
551 observe one homozygous carrier of *SLC30A10* Thr95Ile in our data, further study will also be  
552 needed to understand the inheritance model of this association; we cannot determine whether risk  
553 in homozygotes is stronger than risk in heterozygotes, unlike cases of HMNDYT1 where  
554 identified cases have all experienced homozygous loss-of-function mutation.

555

556 More broadly, the case of *SLC30A10* fits a pattern of discoveries of recent discoveries showing  
557 that recessive Mendelian disease symptoms can manifest in heterozygous carriers of deleterious  
558 variants, blurring the distinction between recessive and dominant disease genes and bridging the

559 gap between common and rare disease genetics<sup>101,102</sup>. These discoveries are possible only by  
560 combining massive, biobank-scale genotype and phenotype datasets such as the UK Biobank.

## 561 **Methods**

### 562 **Sub-population definition and PC calculation**

563 Sub-populations for analysis were obtained through a combination of self-reported ethnicity and  
564 genetic principal components. First, the White British population was defined using the  
565 categorization performed previously by the UK Biobank<sup>103</sup> (Field 22006 value “Caucasian”);  
566 briefly, this analysis selected the individuals who identify as White British (Field 21000),  
567 performed a series of subject-level QC steps (to remove subjects with high heterozygosity or  
568 missing rate over 5%, removing subjects with genetic and self-reported sex discrepancies and  
569 putative sex chromosome aneuploidies, and removing subjects with second or first degree  
570 relatives and an excess of third degree relatives), performed Bayesian outlier detection using the  
571 R package aberrant<sup>104</sup> to remove ancestry outliers using principal components (PCs) 1+2, 3+4,  
572 and 5+6 (calculated from the global UK Biobank PCs stored in Field 22009), selected a subset of  
573 variants in preparation for PCA by limiting to directly-genotyped (info = 1), missingness across  
574 individuals < 2%, MAF > 1%, regions of known long range LD, and pruning to independent  
575 markers with pairwise LD < 0.1. Based on this procedure used by the UK Biobank to define the  
576 “White British” subset, we defined three additional populations, using other self-reported  
577 ancestry groups as starting points (Field 21000 values “Asian or Asian British”, “Black or Black  
578 British”, and “Chinese”). Principal components were estimated in PLINK using the unrelated  
579 subjects in each subgroup. We then projected all subjects onto the PCs. For the majority of  
580 downstream analyses (calculation of per-variant allele frequency and missingness thresholds,  
581 calculation of LD, and for association analyses performed in PLINK), just the unrelated subset of

582 people in the subpopulation was used, the unrelated sets were used. The exception was  
583 association analyses performed in SAIGE<sup>105</sup>, a generalized mixed model method that allows  
584 inclusion of related individuals; for SAIGE, related individuals were retained in the  
585 subpopulations.

586

587 For validation in an independent subpopulation of the UK Biobank, two other self-reported  
588 ethnicity groups with a sufficient number of *SLC30A10* Thr95Ile carriers were assembled, who  
589 were not included in “White British” (Field 21000 values “White” subgroup “Irish”, and “White”  
590 subgroup “Any other white background” or no reported subgroup).

591

## 592 **Array genotype data for association analysis**

593 Data were obtained from the UK Biobank through application 26041. Genotypes were obtained  
594 through array typing and imputation as described previously<sup>103</sup>. For genome-wide association  
595 analysis, variants were filtered so that imputation quality score (INFO) was greater than 0.8.  
596 Genotype missingness, Hardy-Weinberg equilibrium (HWE), and minor allele frequency (MAF)  
597 were then each calculated across the unrelated subset of individuals in each of the four sub-  
598 populations. For each sub-population a set of variants for GWAS was then defined by filtering  
599 missingness across individuals less than 2%, HWE p-value  $> 10^{-12}$ , and MAF  $> 0.1\%$ .

600

## 601 **Phenotype data**

602 For genome-wide analysis, blood biochemistry values were obtained for ALT (Field 30620) and  
603 AST (Field 30650) and  $\log_{10}$  transformed, consistent with previous genetic studies<sup>14,106</sup>, resulting  
604 in an approximately normal distribution.



605

606 For phenome-wide analysis, ICD10 codes were obtained from inpatient hospital diagnoses (Field  
607 41270), causes of death (Field 40001 and 40002), the cancer registry (Field 40006), and general  
608 practitioner (GP) clinical event records (Field 42040). A selection of 135 quantitative traits was  
609 obtained from other fields (**Supplementary Table 14**), encompassing anthropomorphic  
610 measurements, blood and urine biochemistry, smoking, exercise, sleep behavior, and liver MRI;  
611 all were inverse rank normalized using the RNOmni R package<sup>107</sup>. All quantitative traits and  
612 cancer registry diagnoses were downloaded from the UK Biobank Data Showcase on March 17,  
613 2020. The GP clinical events, inpatient diagnoses, and death registry were available in more  
614 detail or in more recent updates than was available through the Data Showcase and were  
615 downloaded as separate tables; data for GP clinical records were downloaded on March 30,  
616 2019, data from the death registry was downloaded on June 12, 2020, and data from hospital  
617 diagnoses was downloaded on July 15, 2020.

618

### 619 **Genome-wide association studies of ALT and AST**

620 Because of the high level of relatedness in the UK Biobank participants<sup>108</sup>, to maximize power  
621 by retaining related individuals we used SAIGE software package<sup>105</sup> to perform generalized  
622 mixed model analysis for GWAS. A genetic relatedness matrix (GRM) was calculated for each  
623 sub-population with a set of 100,000 LD-pruned variants selected from across the allele  
624 frequency spectrum. SAIGE was run on the filtered imputed variant set in each sub-population  
625 using the following covariates: age at recruitment, sex, BMI, and the first 12 principal  
626 components of genetic ancestry (learned within each sub-population as described above).  
627 Manhattan plots and Q-Q plots were created using the qqman R package<sup>109</sup>. The association

628 results for each enzyme were meta-analyzed across the four populations using the METAL  
629 software package<sup>110</sup> using the default approach (using p-value and direction of effect weighted  
630 according to sample size.) To report p-value results, the default approach was used. To report  
631 effect sizes and standard errors, because the authors of the SAIGE method advise that parameter  
632 estimation may be poor especially for rare variants<sup>111</sup>, the PLINK software package v1.90<sup>112</sup> was  
633 run on lead variants on the unrelated subsets of each subpopulation, and then the classical  
634 approach (using effect size estimates and standard errors) was used in METAL to meta-analyze  
635 the resulting betas and standard errors. All PLINK and SAIGE association tests were performed  
636 using the REVEAL/SciDB translational analytics platform from Paradigm4.

637

### 638 **Identifying independent, linked association signals between the two GWAS**

639 Meta-analysis results for each enzyme were LD clumped using the PLINK software package,  
640 v1.90<sup>112</sup> with an  $r^2$  threshold of 0.2 and a distance limit of 10 megabases, to group the results into  
641 approximately independent signals. LD calculations were made using genotypes of the White  
642 British sub-population because of their predominance in the overall sample. Lead variants (the  
643 variants with the most significant p-values) from these “ $r^2 > 0.2$  LD blocks” were then searched  
644 for proxies using an  $r^2$  threshold of 0.8 and a distance limit of 250 kilobases, resulting in “ $r^2 >$   
645 0.8 LD blocks” defining potentially causal variants at each locus. The “ $r^2 > 0.8$  LD blocks” for  
646 the ALT results were then compared to the “ $r^2 > 0.8$  LD blocks” for the AST results, and any  
647 cases where these blocks shared at least one variant between the two GWAS were treated as  
648 potentially colocalized association signals between the two GWAS. In these cases, a  
649 representative index variant was chosen to represent the results of both GWAS by choosing the  
650 index variant of the GWAS with the more significant p-value. Next, these putative colocalized

651 association signals were then distance pruned by iteratively removing neighboring index variants  
652 within 500 kilobases of each index variant with less significant p-values (the minimum p-value  
653 between the two GWAS was used for the distance pruning procedure.) The Manhattan plot of  
654 METAL results with labeled colocalization signals was created using the CMplot R package<sup>113</sup>.

655

## 656 **Annotation of associated loci and variants**

657 Index variants and their corresponding strongly-linked ( $r^2 > 0.8$ ) variants were annotated using  
658 the following resources: distance to closest protein-coding genes as defined by ENSEMBL v98  
659 using the BEDTools package<sup>114</sup>, impact on protein-coding genes using the ENSEMBL Variant  
660 Effect Predictor (VEP) software package<sup>115</sup> with the LOFTEE plugin to additionally predict  
661 protein-truncating variants<sup>116</sup>; eQTLs (only the most significant eQTL per gene-tissue  
662 combination) from GTEx v8 (obtained from the GTEx Portal) for liver, kidney cortex, and  
663 skeletal muscle<sup>117</sup>; a published meta-analysis of four liver eQTL studies<sup>41</sup>; the eQTLGen meta-  
664 analysis of blood eQTL studies<sup>118</sup>; and GWAS results from the NHGRI-EBI GWAS Catalog  
665 (r2020-01-27)<sup>119</sup>, filtered to associations with  $p < 5 \times 10^{-8}$ .

666

## 667 **Association of ALT- and AST-associated loci with liver disease**

668 Index variants were tested for association with any liver disease using ICD10 codes K70-K77 in  
669 inpatient hospital diagnoses, causes of death, and GP clinical event records, using SAIGE, with  
670 the same covariates used for the liver enzymes (age, sex, and genetic PCs 1-12) plus a covariate  
671 for each of the following: whether the subject was recruited in Scotland, whether the subject was  
672 recruited in Wales, and whether the patient had GP clinical event records available. Association  
673 results were meta-analyzed across the four sub-populations using METAL using the default

674 method (combining p-values) to obtain the final p-value. To obtain effect sizes and standard  
675 errors, the same procedure was performed but using PLINK (on the unrelated subset of each  
676 population) and using the classical method in METAL (combining effects and standard errors.)

677

### 678 **Sequencing-based validation of rs188273166 array genotyping**

679 Whole exome sequencing was available for 301,473 of the 487,327 array-genotyped samples.  
680 DNA was extracted from whole blood and was prepared and sequenced by the Regeneron  
681 Genetics Center (RGC). A complete protocol has been described elsewhere<sup>120</sup>. Briefly, the xGen  
682 exome capture was used and reads were sequenced using the Illumina NovaSeq 6000 platform.  
683 Reads were aligned to the GRCh38 reference genome using BWA-mem<sup>121</sup>. Duplicate reads were  
684 identified and excluded using the Picard MarkDuplicates tool (Broad Institute)<sup>122</sup>. Variant calling  
685 of SNVs and indels was done using the WeCall variant caller (Genomics Plc.)<sup>123</sup> to produce a  
686 GVCF file for each subject (GVCF files are files in the VCF Variant Call Format that are  
687 indexed for fast processing). GVCF files were combined to using the GLnexus joint calling  
688 tool<sup>124</sup>. Post-variant calling filtering was applied as described previously<sup>120</sup>.

689

### 690 **Replication of *SLC30A10* Thr95Ile associations**

691 ALT and AST association tests were repeated as described for the genome-wide scans, using  
692 SAIGE and PLINK, in the “Other White” and “White Irish” populations, for the *SLC30A10*  
693 Thr95Ile (rs188273166) variant. In the two DiscovEHR Geisinger Health Service (GHS) cohorts,  
694 association tests were performed using BOLT<sup>125</sup> with covariates for age, age squared, age x sex,  
695 sex, and the first ten principal components of genetic ancestry; ALT, AST, and hematocrit values

696 were taken from the median of lab values available. Results were meta-analyzed across the four  
697 populations. A forest plot was created using the forestplot package in R<sup>126</sup>.

698

### 699 **Testing linkage of *SLC30A10* Thr95Ile to common GWAS variants**

700 To test linkage of *SLC30A10* Thr95Ile (rs188273166) to common GWAS variants, the GWAS  
701 Catalog was searched for all results where “Mapped Gene” was assigned to *SLC30A10*; because  
702 of the very relevant phenotype, blood Mn-associated variant rs1776029, an association that is not  
703 in the GWAS Catalog, was also included in the analysis, as well as cT1-associated variant  
704 rs759359281. LD calculations were performed in PLINK, using the White British unrelated  
705 subpopulation, between rs188273166 and the GWAS variants with the options --r2 dprime-  
706 signed in-phase with-freqs --ld-window 1000000 --ld-window-r2 0. For rs1776029, an additional  
707 Fisher’s exact test was performed to determine the confidence interval of the enrichment of  
708 rs188273166 on the rs1776029 haplotype. The linked alleles from PLINK were then used in  
709 conjunction with the effect allele from the reported papers to determine the direction of effect.  
710 The GWAS Atlas website<sup>46</sup> was used (the PheWAS tool) to determine the direction of effect for  
711 the linked alleles from the original paper; in cases where the original paper from the GWAS  
712 Catalog did not report a direction of effect, other papers for the same phenotype and variant from  
713 GWAS Atlas were used to determine the direction of effect and cited accordingly  
714 (**Supplementary Table 13**). Reference epigenome information for the GWAS variants was  
715 obtained by searching for rs1776029 in HaploReg v4.1<sup>127</sup>.

716

## 717 **Phenome-wide association study of *SLC30A10* Thr95Ile**

718 A phenome-wide association study of *SLC30A10* Thr95Ile (rs188273166) was performed by  
719 running SAIGE and PLINK against a set of ICD10 diagnoses and quantitative traits, obtained as  
720 described above, and using the covariates described above for the test of association with liver  
721 disease. ICD10 diagnoses were filtered to include only those at a three-character (category),  
722 four-character (category plus one additional numeral), or “block” level that were frequent  
723 enough to test in both subpopulations and without significant collinearity with the sex, GP  
724 availability, or country of recruitment covariates: at least 100 diagnoses overall, and at least one  
725 diagnosis in each of the following subgroups, to avoid collinearity with covariates while running  
726 SAIGE: the with- and without-GP data subgroups, men, women, and each of the three  
727 recruitment countries. This resulted in 4,397 ICD10 codes to test, serving as the multiple  
728 hypothesis burden.

729

## 730 **Bioinformatic analysis of *SLC30A10* Thr95Ile**

731 To visualize Thr95Ile on the protein sequence of *SLC30A10*, UNIPROT entry Q6XR72  
732 (ZN10\_HUMAN) was accessed<sup>72</sup>. In UNIPROT, natural variants causing HMNDYT1<sup>32,34,56</sup> and  
733 mutagenesis results<sup>56,73,128</sup> were collated from the literature and highlighted. CADD score v1.5<sup>129</sup>  
734 was downloaded from the authors’ website. SIFT score was obtained from the authors’ website  
735 using the “dbSNP rsIDs (SIFT4G predictions)” tool<sup>130</sup>. PolyPhen score and multiple species  
736 alignment was obtained from the authors’ website using the PolyPhen-2 tool<sup>131</sup>.

737

## 738 **Immunofluorescence of SLC30A10 localization in cultured cells**

739 HeLa cells (ATCC®, Manassas, VA) were grown in Eagle's Minimum Essential Medium  
740 (ATCC®, Manassas, VA) containing 10% fetal bovine serum (Gibco, Carlsbad, CA) at 37°C and  
741 5% CO<sub>2</sub>. All plasmid transfections were performed using Lipofectamine™ 2000 (Invitrogen,  
742 Carlsbad, CA) and Opti-MEM (Gibco, Grand Island, NY) according to manufacturer's  
743 specifications. FLAG-tagged SLC30A10 plasmid constructs designed with a linker sequence in  
744 pCMV6-AN-3DDK (Blue Heron Biotech, Bothell, WA) included wild type, del105-107, L89P,  
745 T95I, and used an empty vector for one of the negative controls.

746  
747 HeLa cells were grown on 8-chambered slides for 48 hours post-transfection. IF procedures were  
748 performed at room temperature unless otherwise noted. HeLa cells were rinsed in dPBS (Gibco,  
749 Grand Island, NY), fixed with 4% paraformaldehyde (in water) (Electron Microscopy Sciences,  
750 Hatfield, PA) for 10 min, rinsed in 4°C PBS (Invitrogen, Vilnius, LT), and permeabilized for 5  
751 minutes with 0.1% Triton X-100 (Sigma-Aldrich, St. Louis, MO). After rinsing in PBS and  
752 blocking in 2% BSA (in PBS) (Jackson ImmunoResearch, West Grove, PA) for 30 minutes, the  
753 cells were stained with 2% BSA blocking solution containing monoclonal ANTI-FLAG® M2-  
754 FITC, Clone M2 (dilution 1:100; Sigma-Aldrich, St. Louis, MO) and Calnexin Monoclonal  
755 Antibody, Clone AF18 (dilution 1:100; Invitrogen, Carlsbad, CA). After three final washes in  
756 dPBS, mounting medium with DAPI (Vector Laboratories, Burlingame, CA) was added and  
757 sealed under a coverslip with nail polish. Images were captured with the REVOLVE Echo  
758 microscope at 20X magnification.

## 759 **Acknowledgements**

760 This research has been conducted using the UK Biobank resource, application number 26041.

761 We thank the UK Biobank participants for their donations to this resource.

## 762 **Author Contributions**

763 A.D., A.F.C., S.T., L.W., M.P., and P.N. performed the main computational analyses; C.Q. and

764 H.C.T. performed experiments; L.L., N.V., and M.F. performed replication analyses in

765 DiscovEHR; L.W. wrote the manuscript; all authors interpreted results and edited the

766 manuscript.

## 767 **Competing Interests**

768 A.D., A.F.C., S.T., L.W., M.P., P.N., C.Q., H.C.T., G.H., and P.H. are employees of Alnylam

769 Pharmaceuticals, Inc. L.L., N.V., M.F., and A.B. are employees of Regeneron Pharmaceuticals,

770 Inc.

## 771 **Ethical Compliance**

772 Ethics oversight for the UK Biobank is provided by an Ethics and Governance Council which

773 obtained informed consent from all participants for health-related research. All research

774 described was performed within the framework of Application 26041.

## 775 **Data Availability**

776 Complete summary statistics from the genome-wide association studies of ALT, AST, and

777 extrahepatic bile duct cancer have been submitted to the NHGRI-EBI GWAS catalog

778 (<https://www.ebi.ac.uk/gwas/>).



## 779 **References**

780

- 781 1 Asrani, S. K., Devarbhavi, H., Eaton, J. & Kamath, P. S. Burden of liver diseases in the  
782 world. *J Hepatol* **70**, 151-171, doi:10.1016/j.jhep.2018.09.014 (2019).
- 783 2 Younossi, Z. M. *et al.* Changes in the prevalence of the most common causes of chronic  
784 liver diseases in the United States from 1988 to 2008. *Clin Gastroenterol Hepatol* **9**, 524-  
785 530 e521; quiz e560, doi:10.1016/j.cgh.2011.03.020 (2011).
- 786 3 Plenge, R. M., Scolnick, E. M. & Altshuler, D. Validating therapeutic targets through  
787 human genetics. *Nat Rev Drug Discov* **12**, 581-594, doi:10.1038/nrd4051 (2013).
- 788 4 Stevens, J. L. & Baker, T. K. The future of drug safety testing: expanding the view and  
789 narrowing the focus. *Drug Discov Today* **14**, 162-167, doi:10.1016/j.drudis.2008.11.009  
790 (2009).
- 791 5 Deaton, A. M. *et al.* Rationalizing Secondary Pharmacology Screening Using Human  
792 Genetic and Pharmacological Evidence. *Toxicol Sci* **167**, 593-603,  
793 doi:10.1093/toxsci/kfy265 (2019).
- 794 6 van Beek, J. H. *et al.* The genetic architecture of liver enzyme levels: GGT, ALT and AST.  
795 *Behav Genet* **43**, 329-339, doi:10.1007/s10519-013-9593-y (2013).
- 796 7 Pratt, D. S. & Kaplan, M. M. Evaluation of abnormal liver-enzyme results in  
797 asymptomatic patients. *The New England journal of medicine* **342**, 1266-1271,  
798 doi:10.1056/NEJM200004273421707 (2000).
- 799 8 Rahmioglu, N. *et al.* Epidemiology and genetic epidemiology of the liver function test  
800 proteins. *PloS one* **4**, e4435, doi:10.1371/journal.pone.0004435 (2009).
- 801 9 Pilia, G. *et al.* Heritability of cardiovascular and personality traits in 6,148 Sardinians.  
802 *PLoS genetics* **2**, e132, doi:10.1371/journal.pgen.0020132 (2006).
- 803 10 Makkonen, J., Pietilainen, K. H., Rissanen, A., Kaprio, J. & Yki-Jarvinen, H. Genetic factors  
804 contribute to variation in serum alanine aminotransferase activity independent of  
805 obesity and alcohol: a study in monozygotic and dizygotic twins. *J Hepatol* **50**, 1035-  
806 1042, doi:10.1016/j.jhep.2008.12.025 (2009).
- 807 11 Nilsson, S. E., Read, S., Berg, S. & Johansson, B. Heritabilities for fifteen routine  
808 biochemical values: findings in 215 Swedish twin pairs 82 years of age or older. *Scand J*  
809 *Clin Lab Invest* **69**, 562-569, doi:10.1080/00365510902814646 (2009).
- 810 12 Bathum, L. *et al.* Evidence for a substantial genetic influence on biochemical liver  
811 function tests: results from a population-based Danish twin study. *Clin Chem* **47**, 81-87  
812 (2001).
- 813 13 Targher, G. Elevated serum gamma-glutamyltransferase activity is associated with  
814 increased risk of mortality, incident type 2 diabetes, cardiovascular events, chronic  
815 kidney disease and cancer - a narrative review. *Clin Chem Lab Med* **48**, 147-157,  
816 doi:10.1515/CCLM.2010.031 (2010).
- 817 14 Chambers, J. C. *et al.* Genome-wide association study identifies loci influencing  
818 concentrations of liver enzymes in plasma. *Nature genetics* **43**, 1131-1138,  
819 doi:10.1038/ng.970 (2011).

- 820 15 Young, K. A. *et al.* Genome-Wide Association Study Identifies Loci for Liver Enzyme  
821 Concentrations in Mexican Americans: The GUARDIAN Consortium. *Obesity (Silver*  
822 *Spring)* **27**, 1331-1337, doi:10.1002/oby.22527 (2019).
- 823 16 Park, T. J. *et al.* Genome-wide association study of liver enzymes in Korean children.  
824 *Genomics Inform* **11**, 149-154, doi:10.5808/GI.2013.11.3.149 (2013).
- 825 17 Moon, S. *et al.* The Korea Biobank Array: Design and Identification of Coding Variants  
826 Associated with Blood Biochemical Traits. *Sci Rep* **9**, 1382, doi:10.1038/s41598-018-  
827 37832-9 (2019).
- 828 18 Kanai, M. *et al.* Genetic analysis of quantitative traits in the Japanese population links  
829 cell types to complex human diseases. *Nature genetics* **50**, 390-400,  
830 doi:10.1038/s41588-018-0047-6 (2018).
- 831 19 Kamatani, Y. *et al.* Genome-wide association study of hematological and biochemical  
832 traits in a Japanese population. *Nature genetics* **42**, 210-215, doi:10.1038/ng.531 (2010).
- 833 20 Kim, Y. J. *et al.* Large-scale genome-wide association studies in East Asians identify new  
834 genetic loci influencing metabolic traits. *Nature genetics* **43**, 990-995,  
835 doi:10.1038/ng.939 (2011).
- 836 21 Prins, B. P. *et al.* Genome-wide analysis of health-related biomarkers in the UK  
837 Household Longitudinal Study reveals novel associations. *Sci Rep* **7**, 11008,  
838 doi:10.1038/s41598-017-10812-1 (2017).
- 839 22 Namjou, B. *et al.* GWAS and enrichment analyses of non-alcoholic fatty liver disease  
840 identify new trait-associated genes and pathways across eMERGE Network. *BMC Med*  
841 **17**, 135, doi:10.1186/s12916-019-1364-z (2019).
- 842 23 Gurdasani, D. *et al.* Uganda Genome Resource Enables Insights into Population History  
843 and Genomic Discovery in Africa. *Cell* **179**, 984-1002 e1036,  
844 doi:10.1016/j.cell.2019.10.004 (2019).
- 845 24 Gilly, A. *et al.* Very low-depth whole-genome sequencing in complex trait association  
846 studies. *Bioinformatics* **35**, 2555-2561, doi:10.1093/bioinformatics/bty1032 (2019).
- 847 25 Romeo, S. *et al.* Genetic variation in PNPLA3 confers susceptibility to nonalcoholic fatty  
848 liver disease. *Nat Genet* **40**, 1461-1465, doi:10.1038/ng.257 (2008).
- 849 26 Abul-Husn, N. S. *et al.* A Protein-Truncating HSD17B13 Variant and Protection from  
850 Chronic Liver Disease. *The New England journal of medicine* **378**, 1096-1106,  
851 doi:10.1056/NEJMoa1712191 (2018).
- 852 27 Seve, M., Chimienti, F., Devergnas, S. & Favier, A. In silico identification and expression  
853 of SLC30 family genes: an expressed sequence tag data mining strategy for the  
854 characterization of zinc transporters' tissue expression. *BMC Genomics* **5**, 32,  
855 doi:10.1186/1471-2164-5-32 (2004).
- 856 28 Tuschl, K. *et al.* Syndrome of hepatic cirrhosis, dystonia, polycythemia, and  
857 hypermanganesemia caused by mutations in SLC30A10, a manganese transporter in  
858 man. *American journal of human genetics* **90**, 457-466, doi:10.1016/j.ajhg.2012.01.018  
859 (2012).
- 860 29 Brna, P., Gordon, K., Dooley, J. M. & Price, V. Manganese toxicity in a child with iron  
861 deficiency and polycythemia. *J Child Neurol* **26**, 891-894,  
862 doi:10.1177/0883073810393962 (2011).

- 863 30 Gospe, S. M., Jr. *et al.* Paraparesis, hypermanganesaemia, and polycythaemia: a novel  
864 presentation of cirrhosis. *Arch Dis Child* **83**, 439-442, doi:10.1136/ad.83.5.439 (2000).
- 865 31 Lechpammer, M. *et al.* Pathology of inherited manganese transporter deficiency. *Ann*  
866 *Neurol* **75**, 608-612, doi:10.1002/ana.24131 (2014).
- 867 32 Quadri, M. *et al.* Mutations in SLC30A10 cause parkinsonism and dystonia with  
868 hypermanganesemia, polycythemia, and chronic liver disease. *American journal of*  
869 *human genetics* **90**, 467-477, doi:10.1016/j.ajhg.2012.01.017 (2012).
- 870 33 Sahni, V. *et al.* Case report: a metabolic disorder presenting as pediatric manganism.  
871 *Environ Health Perspect* **115**, 1776-1779, doi:10.1289/ehp.10421 (2007).
- 872 34 Tuschl, K. *et al.* Hepatic cirrhosis, dystonia, polycythaemia and hypermanganesaemia--a  
873 new metabolic disorder. *J Inherit Metab Dis* **31**, 151-163, doi:10.1007/s10545-008-0813-  
874 1 (2008).
- 875 35 Brantly, M., Nukiwa, T. & Crystal, R. G. Molecular basis of alpha-1-antitrypsin deficiency.  
876 *Am J Med* **84**, 13-31, doi:10.1016/0002-9343(88)90154-4 (1988).
- 877 36 Weedon, M. N. *et al.* Assessing the analytical validity of SNP-chips for detecting very  
878 rare pathogenic variants: implications for direct-to-consumer genetic testing. *bioRxiv*,  
879 696799, doi:10.1101/696799 (2019).
- 880 37 Dewey, F. E. *et al.* Distribution and clinical impact of functional variants in 50,726 whole-  
881 exome sequences from the DiscovEHR study. *Science* **354**, doi:10.1126/science.aaf6814  
882 (2016).
- 883 38 Partnership, A. M. *Common Metabolic Diseases Knowledge Portal*,  
884 <http://hugeamp.org/> (
- 885 39 Emdin, C. A. *et al.* A missense variant in Mitochondrial Amidoxime Reducing Component  
886 1 gene and protection against liver disease. *PLoS genetics* **16**, e1008629,  
887 doi:10.1371/journal.pgen.1008629 (2020).
- 888 40 Speliotes, E. K. *et al.* Genome-wide association analysis identifies variants associated  
889 with nonalcoholic fatty liver disease that have distinct effects on metabolic traits. *PLoS*  
890 *Genet* **7**, e1001324, doi:10.1371/journal.pgen.1001324 (2011).
- 891 41 Strunz, T. *et al.* A mega-analysis of expression quantitative trait loci (eQTL) provides  
892 insight into the regulatory architecture of gene expression variation in liver. *Sci Rep* **8**,  
893 5865, doi:10.1038/s41598-018-24219-z (2018).
- 894 42 Ng, E. *et al.* Genome-wide association study of toxic metals and trace elements reveals  
895 novel associations. *Hum Mol Genet* **24**, 4739-4745, doi:10.1093/hmg/ddv190 (2015).
- 896 43 Corre, T. *et al.* Common variants in CLDN14 are associated with differential excretion of  
897 magnesium over calcium in urine. *Pflugers Arch* **469**, 91-103, doi:10.1007/s00424-016-  
898 1913-7 (2017).
- 899 44 Kichaev, G. *et al.* Leveraging Polygenic Functional Enrichment to Improve GWAS Power.  
900 *American journal of human genetics* **104**, 65-75, doi:10.1016/j.ajhg.2018.11.008 (2019).
- 901 45 Astle, W. J. *et al.* The Allelic Landscape of Human Blood Cell Trait Variation and Links to  
902 Common Complex Disease. *Cell* **167**, 1415-1429 e1419, doi:10.1016/j.cell.2016.10.042  
903 (2016).
- 904 46 Tian, D. *et al.* GWAS Atlas: a curated resource of genome-wide variant-trait associations  
905 in plants and animals. *Nucleic Acids Res* **48**, D927-D932, doi:10.1093/nar/gkz828 (2020).

- 906 47 Kim, S. K. Identification of 613 new loci associated with heel bone mineral density and a  
907 polygenic risk score for bone mineral density, osteoporosis and fracture. *PloS one* **13**,  
908 e0200785, doi:10.1371/journal.pone.0200785 (2018).
- 909 48 Morris, J. A. *et al.* An atlas of genetic influences on osteoporosis in humans and mice.  
910 *Nature genetics* **51**, 258-266, doi:10.1038/s41588-018-0302-x (2019).
- 911 49 Kemp, J. P. *et al.* Identification of 153 new loci associated with heel bone mineral  
912 density and functional involvement of GPC6 in osteoporosis. *Nature genetics* **49**, 1468-  
913 1475, doi:10.1038/ng.3949 (2017).
- 914 50 Parisinos, C. A. *et al.* Genome-wide and Mendelian randomisation studies of liver MRI  
915 yield insights into the pathogenesis of steatohepatitis. *J Hepatol*,  
916 doi:10.1016/j.jhep.2020.03.032 (2020).
- 917 51 Trieb, M. *et al.* Liver disease alters high-density lipoprotein composition, metabolism  
918 and function. *Biochim Biophys Acta* **1861**, 630-638, doi:10.1016/j.bbaliip.2016.04.013  
919 (2016).
- 920 52 Aguet, F. *et al.* The GTEx Consortium atlas of genetic regulatory effects across human  
921 tissues. *bioRxiv*, 787903, doi:10.1101/787903 (2019).
- 922 53 Ramachandran, P. *et al.* Resolving the fibrotic niche of human liver cirrhosis at single-cell  
923 level. *Nature* **575**, 512-518, doi:10.1038/s41586-019-1631-3 (2019).
- 924 54 MacParland, S. A. *et al.* Single cell RNA sequencing of human liver reveals distinct  
925 intrahepatic macrophage populations. *Nat Commun* **9**, 4383, doi:10.1038/s41467-018-  
926 06318-7 (2018).
- 927 55 Aizarani, N. *et al.* A human liver cell atlas reveals heterogeneity and epithelial  
928 progenitors. *Nature* **572**, 199-204, doi:10.1038/s41586-019-1373-2 (2019).
- 929 56 Leyva-Illades, D. *et al.* SLC30A10 is a cell surface-localized manganese efflux transporter,  
930 and parkinsonism-causing mutations block its intracellular trafficking and efflux activity.  
931 *J Neurosci* **34**, 14079-14095, doi:10.1523/JNEUROSCI.2329-14.2014 (2014).
- 932 57 Yuan, X. *et al.* Population-based genome-wide association studies reveal six loci  
933 influencing plasma levels of liver enzymes. *Am J Hum Genet* **83**, 520-528,  
934 doi:10.1016/j.ajhg.2008.09.012 (2008).
- 935 58 Liu, Y. *et al.* Genome-Wide Study Links PNPLA3 Variant With Elevated Hepatic  
936 Transaminase After Acute Lymphoblastic Leukemia Therapy. *Clin Pharmacol Ther* **102**,  
937 131-140, doi:10.1002/cpt.629 (2017).
- 938 59 Whitfield, J. B. *et al.* Biomarker and Genomic Risk Factors for Liver Function Test  
939 Abnormality in Hazardous Drinkers. *Alcohol Clin Exp Res* **43**, 473-482,  
940 doi:10.1111/acer.13949 (2019).
- 941 60 Xu, C. F. *et al.* HLA-B\*57:01 Confers Susceptibility to Pazopanib-Associated Liver Injury in  
942 Patients with Cancer. *Clin Cancer Res* **22**, 1371-1377, doi:10.1158/1078-0432.CCR-15-  
943 2044 (2016).
- 944 61 Feder, J. N. *et al.* A novel MHC class I-like gene is mutated in patients with hereditary  
945 haemochromatosis. *Nature genetics* **13**, 399-408, doi:10.1038/ng0896-399 (1996).
- 946 62 Kozlitina, J. *et al.* Exome-wide association study identifies a TM6SF2 variant that confers  
947 susceptibility to nonalcoholic fatty liver disease. *Nature genetics* **46**, 352-356,  
948 doi:10.1038/ng.2901 (2014).

- 949 63 Holmen, O. L. *et al.* Systematic evaluation of coding variation identifies a candidate  
950 causal variant in TM6SF2 influencing total cholesterol and myocardial infarction risk.  
951 *Nature genetics* **46**, 345-351, doi:10.1038/ng.2926 (2014).
- 952 64 Liu, Y. L. *et al.* TM6SF2 rs58542926 influences hepatic fibrosis progression in patients  
953 with non-alcoholic fatty liver disease. *Nat Commun* **5**, 4309, doi:10.1038/ncomms5309  
954 (2014).
- 955 65 Buch, S. *et al.* A genome-wide association scan identifies the hepatic cholesterol  
956 transporter ABCG8 as a susceptibility factor for human gallstone disease. *Nature*  
957 *genetics* **39**, 995-999, doi:10.1038/ng2101 (2007).
- 958 66 Ferkingstad, E. *et al.* Genome-wide association meta-analysis yields 20 loci associated  
959 with gallstone disease. *Nat Commun* **9**, 5101, doi:10.1038/s41467-018-07460-y (2018).
- 960 67 Tsutsumi, S. *et al.* The novel gene encoding a putative transmembrane protein is  
961 mutated in gnathodiaphyseal dysplasia (GDD). *American journal of human genetics* **74**,  
962 1255-1261, doi:10.1086/421527 (2004).
- 963 68 Penttila, S. *et al.* Eight new mutations and the expanding phenotype variability in  
964 muscular dystrophy caused by ANO5. *Neurology* **78**, 897-903,  
965 doi:10.1212/WNL.0b013e31824c4682 (2012).
- 966 69 Hayes, M. G. *et al.* Identification of HKDC1 and BACE2 as genes influencing glycemic  
967 traits during pregnancy through genome-wide association studies. *Diabetes* **62**, 3282-  
968 3291, doi:10.2337/db12-1692 (2013).
- 969 70 Guo, C. *et al.* Coordinated regulatory variation associated with gestational  
970 hyperglycaemia regulates expression of the novel hexokinase HKDC1. *Nat Commun* **6**,  
971 6069, doi:10.1038/ncomms7069 (2015).
- 972 71 Sherry, S. T., Ward, M. & Sirotkin, K. dbSNP-database for single nucleotide  
973 polymorphisms and other classes of minor genetic variation. *Genome Res* **9**, 677-679  
974 (1999).
- 975 72 Arnold, L. M., Hirsch, I., Sanders, P., Ellis, A. & Hughes, B. Safety and efficacy of  
976 esreboxetine in patients with fibromyalgia: a fourteen-week, randomized, double-blind,  
977 placebo-controlled, multicenter clinical trial. *Arthritis and rheumatism* **64**, 2387-2397,  
978 doi:10.1002/art.34390 (2012).
- 979 73 Zogzas, C. E., Aschner, M. & Mukhopadhyay, S. Structural Elements in the  
980 Transmembrane and Cytoplasmic Domains of the Metal Transporter SLC30A10 Are  
981 Required for Its Manganese Efflux Activity. *J Biol Chem* **291**, 15940-15957,  
982 doi:10.1074/jbc.M116.726935 (2016).
- 983 74 Park, J. H. *et al.* SLC39A8 Deficiency: A Disorder of Manganese Transport and  
984 Glycosylation. *American journal of human genetics* **97**, 894-903,  
985 doi:10.1016/j.ajhg.2015.11.003 (2015).
- 986 75 Tuschl, K. *et al.* Mutations in SLC39A14 disrupt manganese homeostasis and cause  
987 childhood-onset parkinsonism-dystonia. *Nat Commun* **7**, 11601,  
988 doi:10.1038/ncomms11601 (2016).
- 989 76 Scheiber, I. F., Wu, Y., Morgan, S. E. & Zhao, N. The intestinal metal transporter ZIP14  
990 maintains systemic manganese homeostasis. *J Biol Chem* **294**, 9147-9160,  
991 doi:10.1074/jbc.RA119.008762 (2019).

- 992 77 Mercadante, C. J. *et al.* Manganese transporter Slc30a10 controls physiological  
993 manganese excretion and toxicity. *J Clin Invest* **129**, 5442-5461, doi:10.1172/JCI129710  
994 (2019).
- 995 78 Katz, N. & Rader, D. J. Manganese homeostasis: from rare single-gene disorders to  
996 complex phenotypes and diseases. *J Clin Invest* **129**, 5082-5085, doi:10.1172/JCI133120  
997 (2019).
- 998 79 Pavlides, M. *et al.* Multiparametric magnetic resonance imaging for the assessment of  
999 non-alcoholic fatty liver disease severity. *Liver Int* **37**, 1065-1073, doi:10.1111/liv.13284  
1000 (2017).
- 1001 80 Pavlides, M. *et al.* Multiparametric magnetic resonance imaging predicts clinical  
1002 outcomes in patients with chronic liver disease. *J Hepatol* **64**, 308-315,  
1003 doi:10.1016/j.jhep.2015.10.009 (2016).
- 1004 81 Kim, Y. High signal intensities on T1-weighted MRI as a biomarker of exposure to  
1005 manganese. *Ind Health* **42**, 111-115, doi:10.2486/indhealth.42.111 (2004).
- 1006 82 Bae, Y. J. & Kim, M. H. Manganese supplementation improves mineral density of the  
1007 spine and femur and serum osteocalcin in rats. *Biol Trace Elem Res* **124**, 28-34,  
1008 doi:10.1007/s12011-008-8119-6 (2008).
- 1009 83 Strause, L. G., Hegenauer, J., Saltman, P., Cone, R. & Resnick, D. Effects of long-term  
1010 dietary manganese and copper deficiency on rat skeleton. *J Nutr* **116**, 135-141,  
1011 doi:10.1093/jn/116.1.135 (1986).
- 1012 84 Roadmap Epigenomics, C. *et al.* Integrative analysis of 111 reference human  
1013 epigenomes. *Nature* **518**, 317-330, doi:10.1038/nature14248 (2015).
- 1014 85 Crossgrove, J. & Zheng, W. Manganese toxicity upon overexposure. *NMR Biomed* **17**,  
1015 544-553, doi:10.1002/nbm.931 (2004).
- 1016 86 O'Neal, S. L. & Zheng, W. Manganese Toxicity Upon Overexposure: a Decade in Review.  
1017 *Curr Environ Health Rep* **2**, 315-328, doi:10.1007/s40572-015-0056-x (2015).
- 1018 87 Chen, J. Y., Tsao, G. C., Zhao, Q. & Zheng, W. Differential cytotoxicity of Mn(II) and  
1019 Mn(III): special reference to mitochondrial [Fe-S] containing enzymes. *Toxicol Appl*  
1020 *Pharmacol* **175**, 160-168, doi:10.1006/taap.2001.9245 (2001).
- 1021 88 Schizophrenia Working Group of the Psychiatric Genomics, C. Biological insights from  
1022 108 schizophrenia-associated genetic loci. *Nature* **511**, 421-427,  
1023 doi:10.1038/nature13595 (2014).
- 1024 89 Costas, J. The highly pleiotropic gene SLC39A8 as an opportunity to gain insight into the  
1025 molecular pathogenesis of schizophrenia. *Am J Med Genet B Neuropsychiatr Genet* **177**,  
1026 274-283, doi:10.1002/ajmg.b.32545 (2018).
- 1027 90 Mealer, R. G. *et al.* A schizophrenia risk locus alters brain metal transport and plasma  
1028 glycosylation. *bioRxiv*, 757088, doi:10.1101/757088 (2019).
- 1029 91 Krieger, D. *et al.* Manganese and chronic hepatic encephalopathy. *Lancet* **346**, 270-274,  
1030 doi:10.1016/s0140-6736(95)92164-8 (1995).
- 1031 92 Rajoriya, N., Brahmania, M. & J, J. F. Implications of Manganese in Chronic Acquired  
1032 Hepatocerebral Degeneration. *Ann Hepatol* **18**, 274-278,  
1033 doi:10.5604/01.3001.0012.7938 (2019).

- 1034 93 Burkhard, P. R., Delavelle, J., Du Pasquier, R. & Spahr, L. Chronic parkinsonism  
1035 associated with cirrhosis: a distinct subset of acquired hepatocerebral degeneration.  
1036 *Arch Neurol* **60**, 521-528, doi:10.1001/archneur.60.4.521 (2003).
- 1037 94 Anagianni, S. & Tuschl, K. Genetic Disorders of Manganese Metabolism. *Curr Neurol*  
1038 *Neurosci Rep* **19**, 33, doi:10.1007/s11910-019-0942-y (2019).
- 1039 95 Ebert, B. L. & Bunn, H. F. Regulation of the erythropoietin gene. *Blood* **94**, 1864-1877  
1040 (1999).
- 1041 96 Tyson, G. L. & El-Serag, H. B. Risk factors for cholangiocarcinoma. *Hepatology* **54**, 173-  
1042 184, doi:10.1002/hep.24351 (2011).
- 1043 97 Razumilava, N. & Gores, G. J. Cholangiocarcinoma. *Lancet* **383**, 2168-2179,  
1044 doi:10.1016/S0140-6736(13)61903-0 (2014).
- 1045 98 Kim, A. Modulation of MnSOD in Cancer:Epidemiological and Experimental Evidence.  
1046 *Toxicol Res* **26**, 83-93, doi:10.5487/TR.2010.26.2.083 (2010).
- 1047 99 Landrum, M. J. *et al.* ClinVar: public archive of relationships among sequence variation  
1048 and human phenotype. *Nucleic Acids Res* **42**, D980-985, doi:10.1093/nar/gkt1113  
1049 (2014).
- 1050 100 Stamelou, M. & Bhatia, K. P. A new treatable genetic disorder of manganese metabolism  
1051 causing dystonia-parkinsonism and cirrhosis: the "new" Wilson's disease? *Mov Disord*  
1052 **27**, 962, doi:10.1002/mds.25031 (2012).
- 1053 101 Bastarache, L. *et al.* Phenotype risk scores identify patients with unrecognized  
1054 Mendelian disease patterns. *Science* **359**, 1233-1239, doi:10.1126/science.aal4043  
1055 (2018).
- 1056 102 Hou, Y.-C. C. *et al.* Precision Medicine Advancements Using Whole Genome Sequencing,  
1057 Noninvasive Whole Body Imaging, and Functional Diagnostics. *bioRxiv*, 497560,  
1058 doi:10.1101/497560 (2018).
- 1059 103 Bycroft, C. *et al.* Genome-wide genetic data on ~500,000 UK Biobank participants.  
1060 *bioRxiv*, 166298, doi:10.1101/166298 (2017).
- 1061 104 Bellenguez, C. *et al.* A robust clustering algorithm for identifying problematic samples in  
1062 genome-wide association studies. *Bioinformatics* **28**, 134-135,  
1063 doi:10.1093/bioinformatics/btr599 (2012).
- 1064 105 Zhou, W. *et al.* Efficiently controlling for case-control imbalance and sample relatedness  
1065 in large-scale genetic association studies. *Nature genetics* **50**, 1335-1341,  
1066 doi:10.1038/s41588-018-0184-y (2018).
- 1067 106 Nioi, P. *et al.* Variant ASGR1 Associated with a Reduced Risk of Coronary Artery Disease.  
1068 *The New England journal of medicine* **374**, 2131-2141, doi:10.1056/NEJMoa1508419  
1069 (2016).
- 1070 107 McCaw, Z. R., Lane, J. M., Saxena, R., Redline, S. & Lin, X. Operating Characteristics of  
1071 the Rank-Based Inverse Normal Transformation for Quantitative Trait Analysis in  
1072 Genome-Wide Association Studies. *bioRxiv*, 635706, doi:10.1101/635706 (2019).
- 1073 108 Bycroft, C. *et al.* The UK Biobank resource with deep phenotyping and genomic data.  
1074 *Nature* **562**, 203-209, doi:10.1038/s41586-018-0579-z (2018).
- 1075 109 Turner, S. D. qqman: an R package for visualizing GWAS results using Q-Q and  
1076 manhattan plots. *bioRxiv*, 005165, doi:10.1101/005165 (2014).

- 1077 110 Willer, C. J., Li, Y. & Abecasis, G. R. METAL: fast and efficient meta-analysis of  
1078 genomewide association scans. *Bioinformatics* **26**, 2190-2191,  
1079 doi:10.1093/bioinformatics/btq340 (2010).
- 1080 111 Zhou, W. (2018).
- 1081 112 Chang, C. C. *et al.* Second-generation PLINK: rising to the challenge of larger and richer  
1082 datasets. *Gigascience* **4**, 7, doi:10.1186/s13742-015-0047-8 (2015).
- 1083 113 Yin, L. *A high-quality drawing tool designed for Manhattan plot of genomic analysis*,  
1084 <<https://github.com/YinLiLin/R-CMplot>> (2018).
- 1085 114 Quinlan, A. R. & Hall, I. M. BEDTools: a flexible suite of utilities for comparing genomic  
1086 features. *Bioinformatics* **26**, 841-842, doi:10.1093/bioinformatics/btq033 (2010).
- 1087 115 McLaren, W. *et al.* The Ensembl Variant Effect Predictor. *Genome Biol* **17**, 122,  
1088 doi:10.1186/s13059-016-0974-4 (2016).
- 1089 116 Karczewski, K. J. *et al.* The mutational constraint spectrum quantified from variation in  
1090 141,456 humans. *Nature* **581**, 434-443, doi:10.1038/s41586-020-2308-7 (2020).
- 1091 117 Consortium, G. T. *et al.* Genetic effects on gene expression across human tissues. *Nature*  
1092 **550**, 204-213, doi:10.1038/nature24277 (2017).
- 1093 118 Võsa, U. *et al.* Unraveling the polygenic architecture of complex traits using blood eQTL  
1094 metaanalysis. *bioRxiv*, 447367, doi:10.1101/447367 (2018).
- 1095 119 Buniello, A. *et al.* The NHGRI-EBI GWAS Catalog of published genome-wide association  
1096 studies, targeted arrays and summary statistics 2019. *Nucleic Acids Res* **47**, D1005-  
1097 D1012, doi:10.1093/nar/gky1120 (2019).
- 1098 120 Van Hout, C. V. *et al.* Whole exome sequencing and characterization of coding variation  
1099 in 49,960 individuals in the UK Biobank. *bioRxiv*, 572347, doi:10.1101/572347 (2019).
- 1100 121 Li, H. & Durbin, R. Fast and accurate short read alignment with Burrows-Wheeler  
1101 transform. *Bioinformatics* **25**, 1754-1760, doi:10.1093/bioinformatics/btp324 (2009).
- 1102 122 *Picard*, <<http://broadinstitute.github.io/picard/>> (  
1103 123 *WeCall*, <<https://github.com/Genomicsplc/wecall>> (  
1104 124 Lin, M. F. *et al.* GLnexus: joint variant calling for large cohort sequencing. *bioRxiv*,  
1105 343970, doi:10.1101/343970 (2018).
- 1106 125 Loh, P. R., Kichaev, G., Gazal, S., Schoech, A. P. & Price, A. L. Mixed-model association for  
1107 biobank-scale datasets. *Nature genetics* **50**, 906-908, doi:10.1038/s41588-018-0144-6  
1108 (2018).
- 1109 126 Gordon, M. & Lumley, T. forestplot: Advanced Forest Plot Using 'grid' Graphics. *R*  
1110 *package version 1* (2015).
- 1111 127 Ward, L. D. & Kellis, M. HaploReg v4: systematic mining of putative causal variants, cell  
1112 types, regulators and target genes for human complex traits and disease. *Nucleic Acids*  
1113 *Res* **44**, D877-881, doi:10.1093/nar/gkv1340 (2016).
- 1114 128 Zhao, Y., Feresin, R. G., Falcon-Perez, J. M. & Salazar, G. Differential Targeting of  
1115 SLC30A10/ZnT10 Heterodimers to Endolysosomal Compartments Modulates EGF-  
1116 Induced MEK/ERK1/2 Activity. *Traffic* **17**, 267-288, doi:10.1111/tra.12371 (2016).
- 1117 129 Rentzsch, P., Witten, D., Cooper, G. M., Shendure, J. & Kircher, M. CADD: predicting the  
1118 deleteriousness of variants throughout the human genome. *Nucleic Acids Res* **47**, D886-  
1119 D894, doi:10.1093/nar/gky1016 (2019).



1120 130 Vaser, R., Adusumalli, S., Leng, S. N., Sikic, M. & Ng, P. C. SIFT missense predictions for  
1121 genomes. *Nat Protoc* **11**, 1-9, doi:10.1038/nprot.2015.123 (2016).  
1122 131 Adzhubei, I. A. *et al.* A method and server for predicting damaging missense mutations.  
1123 *Nat Methods* **7**, 248-249, doi:10.1038/nmeth0410-248 (2010).  
1124

## 1125 Supplementary Figures

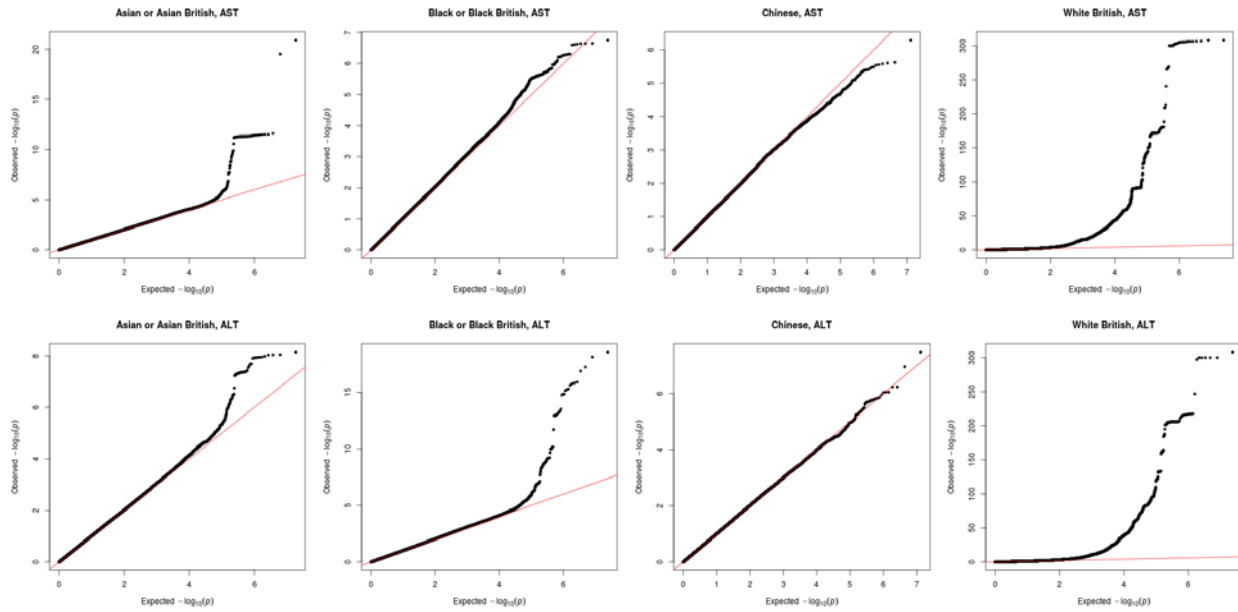

1126

1127

1128

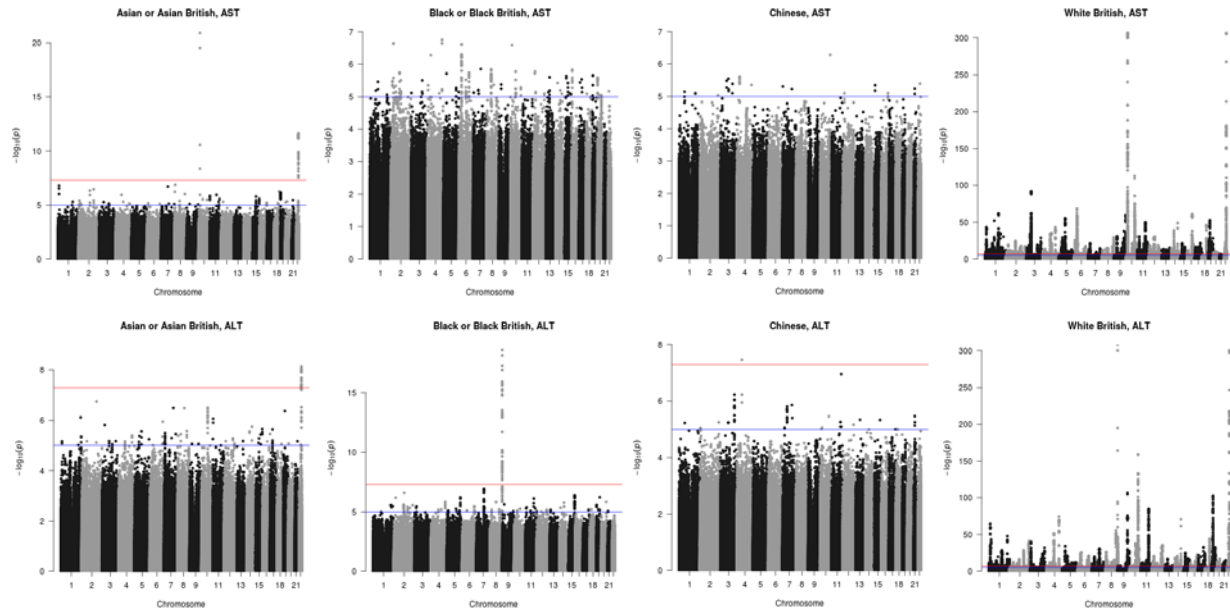

1129

1130

1131

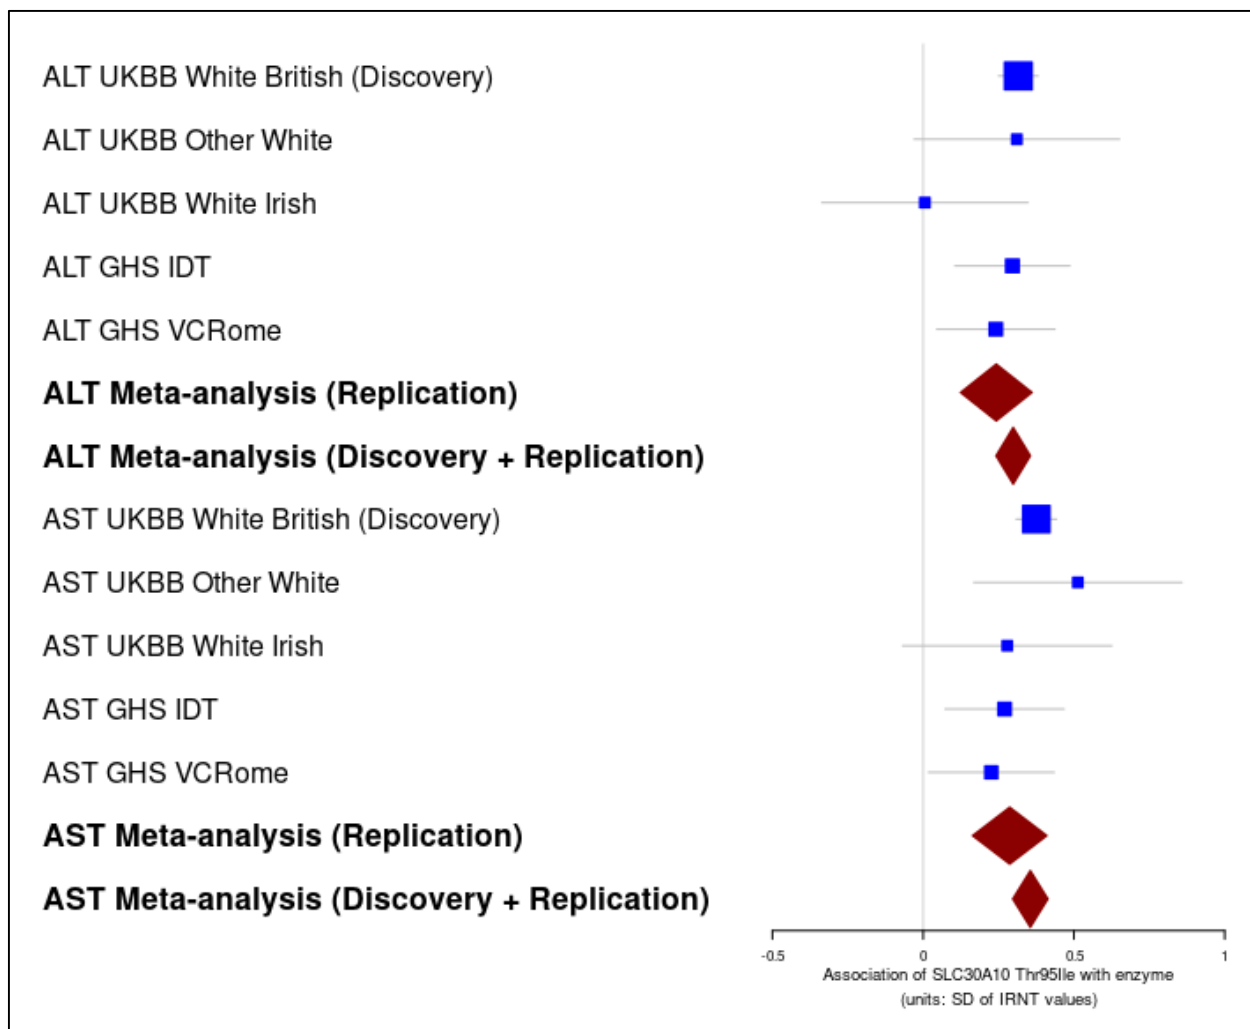

1132

1133

1134 **Supplementary Figure 3:** Forest plot of *SLC30A10* Thr95Ile (rs188273166) association with ALT and AST in the

1135 discovery and replication groups. Boxes show effect size estimates from PLINK, and error bars show 95%

1136 confidence intervals.

1137

1138

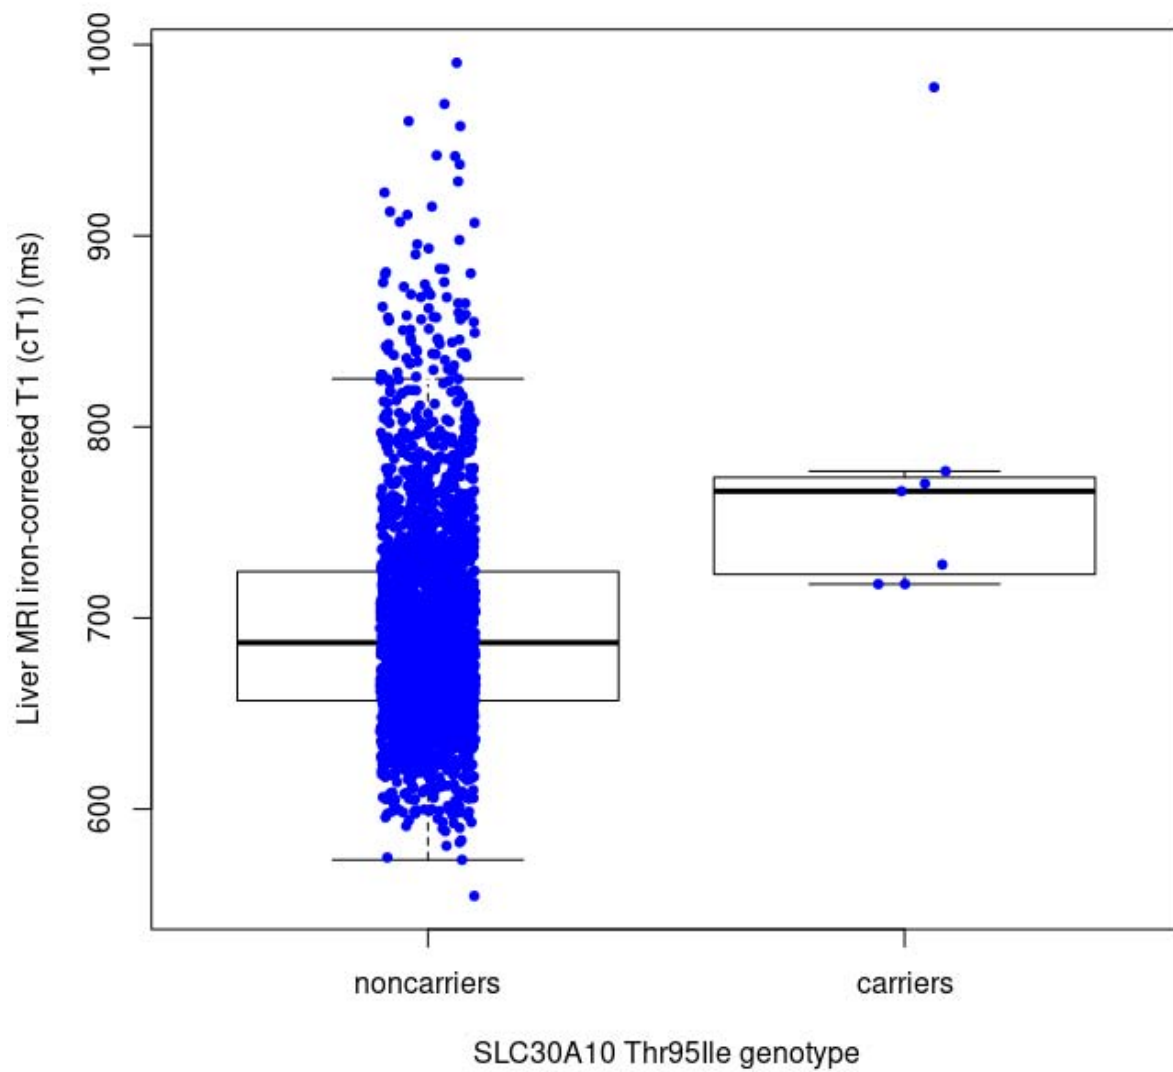

1139

1140 **Supplementary Figure 4:** iron-corrected T1 (cT1) values from liver MRI in seven SLC30A10 Thr95Ile carriers

1141 (limited to the White British population).

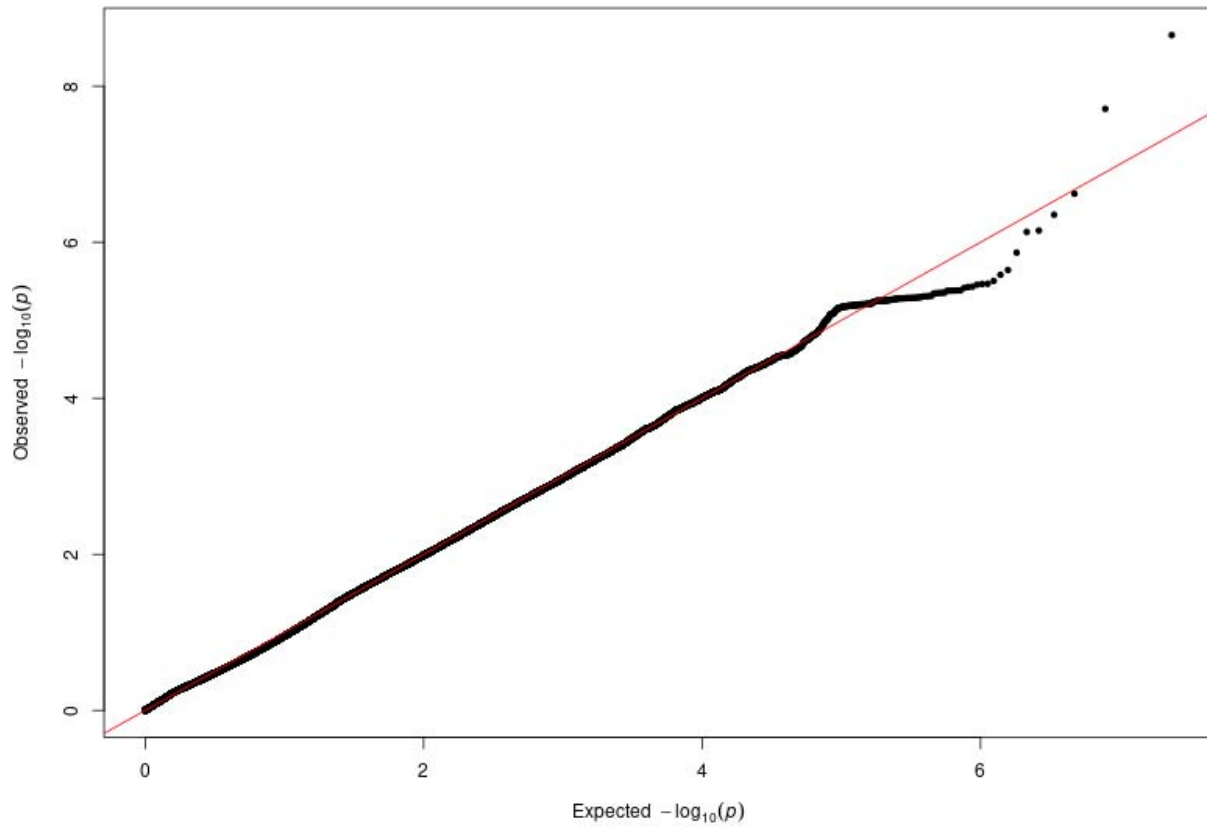

1142

1143 **Supplementary Figure 5:** Q-Q plot of GWAS (p value from SAIGE) for ICD10 diagnosis C24.0, extrahepatic bile

1144 duct cancer.

1145

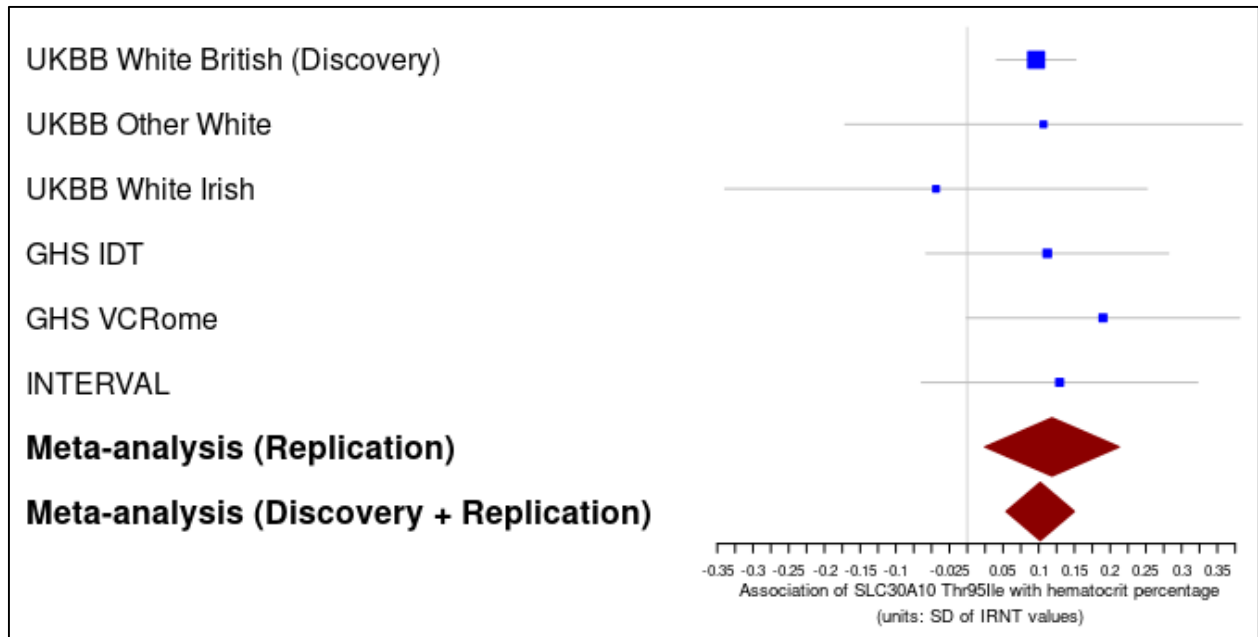

1146

1147 **Supplementary Figure 6:** Forest plot of *SLC30A10* Thr95Ile (rs188273166) association with ALT and AST in the

1148 discovery and replication groups. Boxes show effect size estimates from PLINK, and error bars show 95%

1149 confidence intervals.

1150

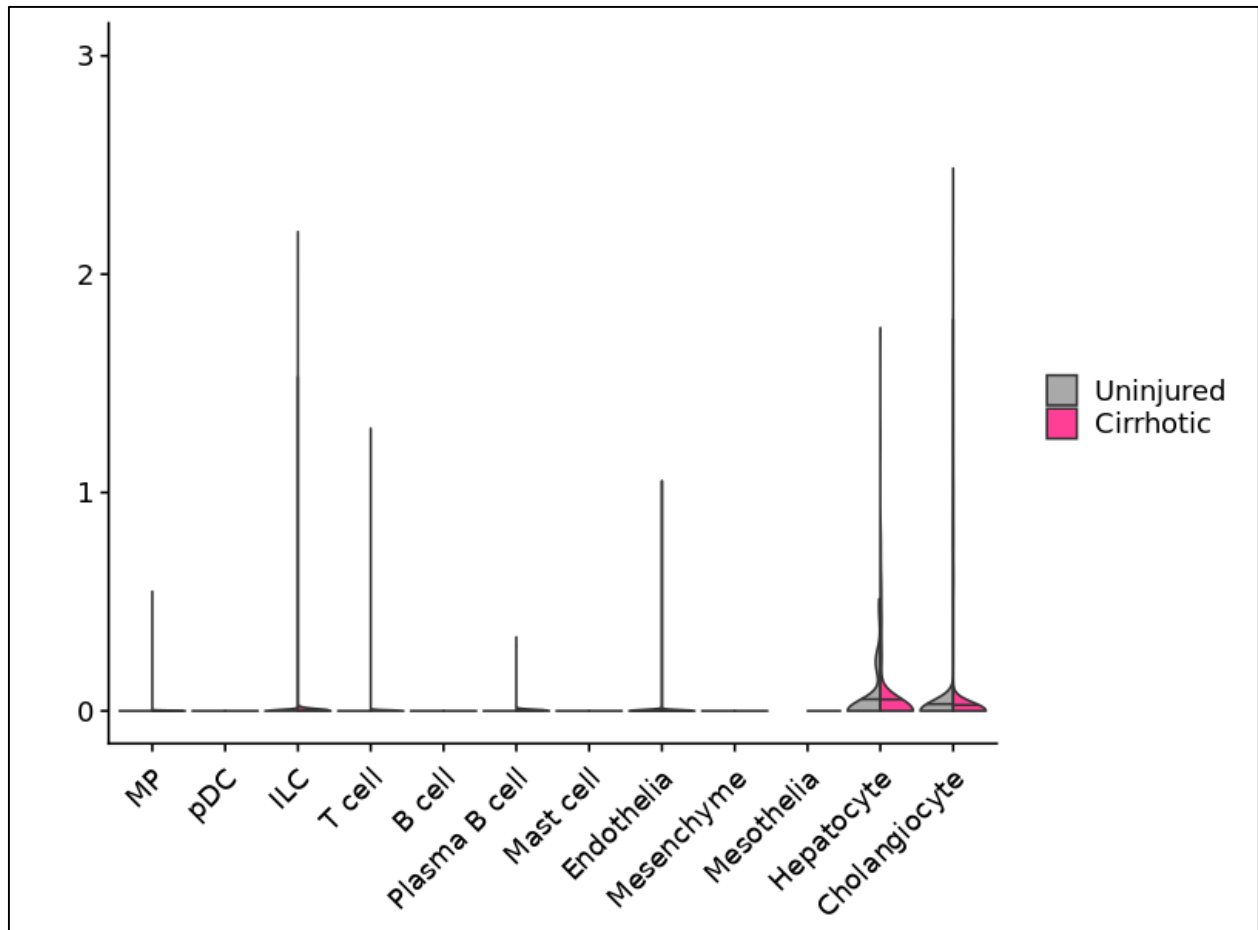

1151

1152 **Supplementary Figure 7:** Single-cell expression data, showing distribution of expression values for SLC30A10

1153 from Ramachandran et al.<sup>53</sup> Produced by <https://www.livercellatlas.mvm.ed.ac.uk/>.

1154 \*

|                           |                               |                               |                     |                              |
|---------------------------|-------------------------------|-------------------------------|---------------------|------------------------------|
| 10                        | 20                            | 30                            | 40                  | 50                           |
| MGR <b>Y</b> SGKTCR       | <u>LLFMLVLTVA</u>             | FFVA <b>E</b> LVSGY           | LGNSIALLS <b>D</b>  | <u>SFNMLS</u> DLIS           |
| 60                        | 70                            | 80                            | 90                  | 100                          |
| <u>LCVGLS</u> SAGYI       | ARRPTRGFS <b>A</b>            | TYGYARA <b>E</b> VV           | GALSNAV <b>F</b> LT | ALCF <b>I</b> IFVEA          |
| 110                       | 120                           | 130                           | 140                 | 150                          |
| <u>VLRL<b>A</b>R</u> PERI | DDPELV <b>L</b> I <b>V</b> IG | VLGLLV <b>N</b> V <b>V</b> IG | LLIFQDCAAW          | FACCLRGRSR                   |
| 160                       | 170                           | 180                           | 190                 | 200                          |
| RLQQRQQLAE                | GCVPGAFGGP                    | QGAEDPRRAA                    | DPTAPGSDSA          | VTLRG <b>T</b> SVER          |
| 210                       | 220                           | 230                           | 240                 | 250                          |
| KREKGATVFA                | NVAGDSFNTQ                    | NEPEDMMKKE                    | KKSEALNIRG          | VLL <b>H</b> V <b>M</b> GDAL |
| 260                       | 270                           | 280                           | 290                 | 300                          |
| <u>GSVV<b>V</b></u> VITAI | IFYVLPLKSE                    | DPCNWQCYID                    | PSLTVLMVII          | ILSSAFPLIK                   |
| 310                       | 320                           | 330                           | 340                 | 350                          |
| ETAAILLQMV                | PKG <b>V</b> NMEELM           | SKLSAVPGIS                    | SVHE <b>V</b> HIWEL | VSGKIIATL <b>H</b>           |
| 360                       | 370                           | 380                           | 390                 | 400                          |
| IKYPKDRGYQ                | DASTKIREIF                    | HHAGIHNVTI                    | QFENVDLKEP          | LEQKDLLLLC                   |
| 410                       | 420                           | 430                           | 440                 | 450                          |
| NSPCISKGCA                | KQLCCPPGAL                    | PLAHVNGCAE                    | HNGGPSLDTY          | GSDGLSRRDA                   |
| 460                       | 470                           | 480                           |                     |                              |
| REVAIEVSLD                | SCLSDHGQSL                    | NKTQEDQCYV                    | NRTHF               |                              |

1155

1156 **Supplementary Figure 8: Protein sequence of SLC30A10 along with experimental evidence cited by**

1157 **UNIPROT**<sup>72</sup>. Underlined are the six transmembrane domains. Highlighted red is Thr95Ile. Highlighted in yellow

1158 are variants that demonstrated abolished Mn transport or membrane localization in vitro; highlighted in blue are

1159 variants that demonstrated lesser or no effect on Mn transport or membrane localization in vitro<sup>56,73,128</sup>. In bold are

1160 variants known to cause SLC30A10 deficiency (HMNDYT1)<sup>32,34,56</sup>.

1161
